# Supplementary material for: Human birth tissue products as a non-opioid medicine to inhibit post-surgical pain
Source: eLife journal article supplement (doi:10.7554/elife.101269), 2024-09-09
Supplement: fig3-figsupp1-data1 [file elife-101269-fig3-figsupp1-data1-v1.pdf]

# Full unedited gel for Figure 3-figure supplement 1A

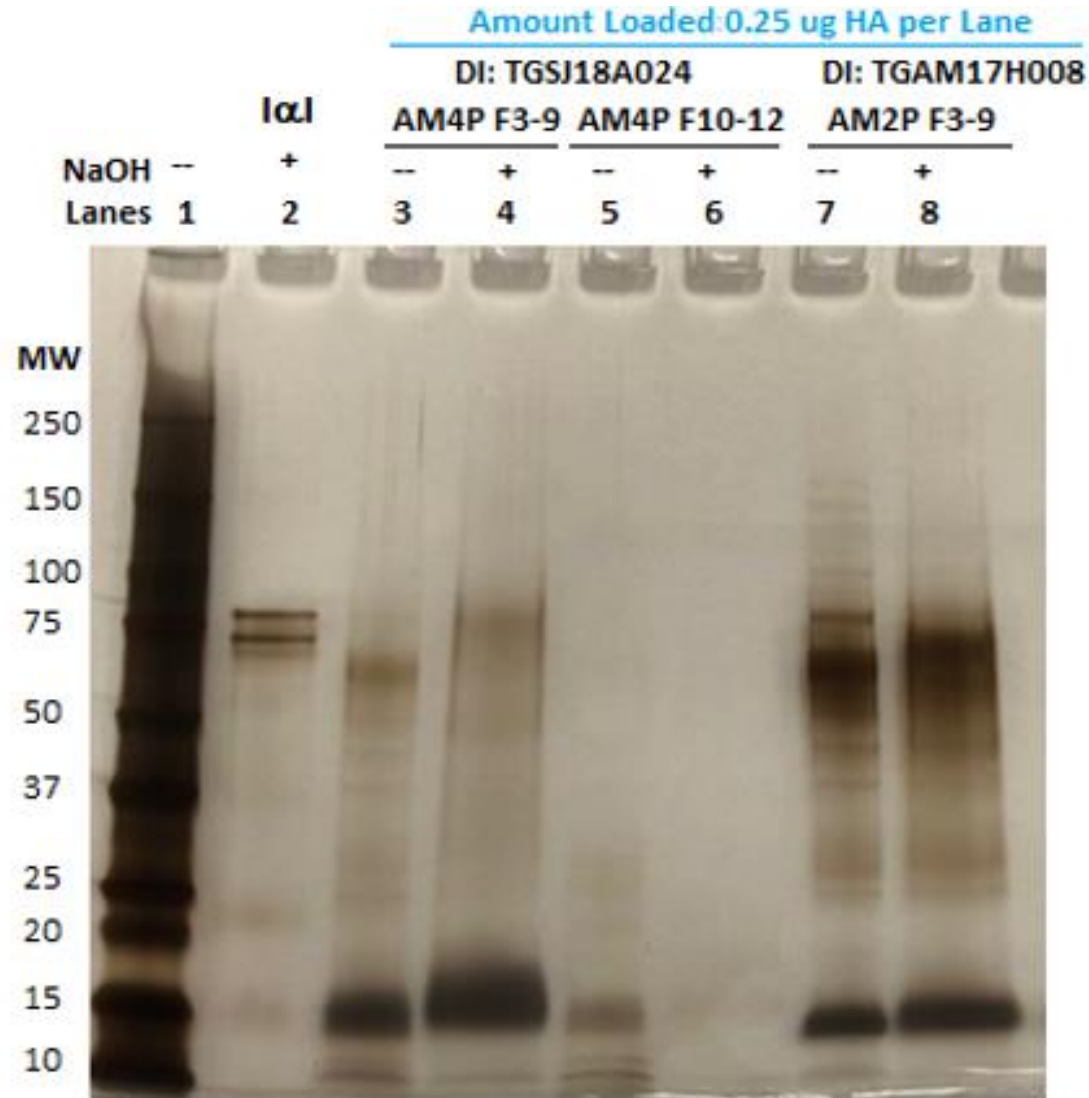

Lanes 1 – 4, 7,8 are shown in Fig. S4A.  
Lanes 5, 6 is cut off because the data is not included in the manuscript.

# Full unedited gel for Figure 3-figure supplement 1B

|       | M | HA | IRM |      |      |      | x | x | IRM | x  | PBS | x  | IRM |    |
|-------|---|----|-----|------|------|------|---|---|-----|----|-----|----|-----|----|
|       |   |    | 4 h | 24 h | 48 h | 72 h |   |   |     |    |     |    |     |    |
| NaOH  | - | -  | -   | -    | -    | -    | x | x | -   | x  | -   | x  | -   |    |
| HAase | - | -  | -   | -    | -    | -    | x | x | -   | x  | +   | x  | +   |    |
| 95°C  | - | -  | -   | -    | -    | -    | x | x | +   | x  | +   | x  | +   |    |
|       | 1 | 2  | 3   | 4    | 5    | 6    | 7 | 8 | 9   | 10 | 11  | 12 | 13  | 14 |

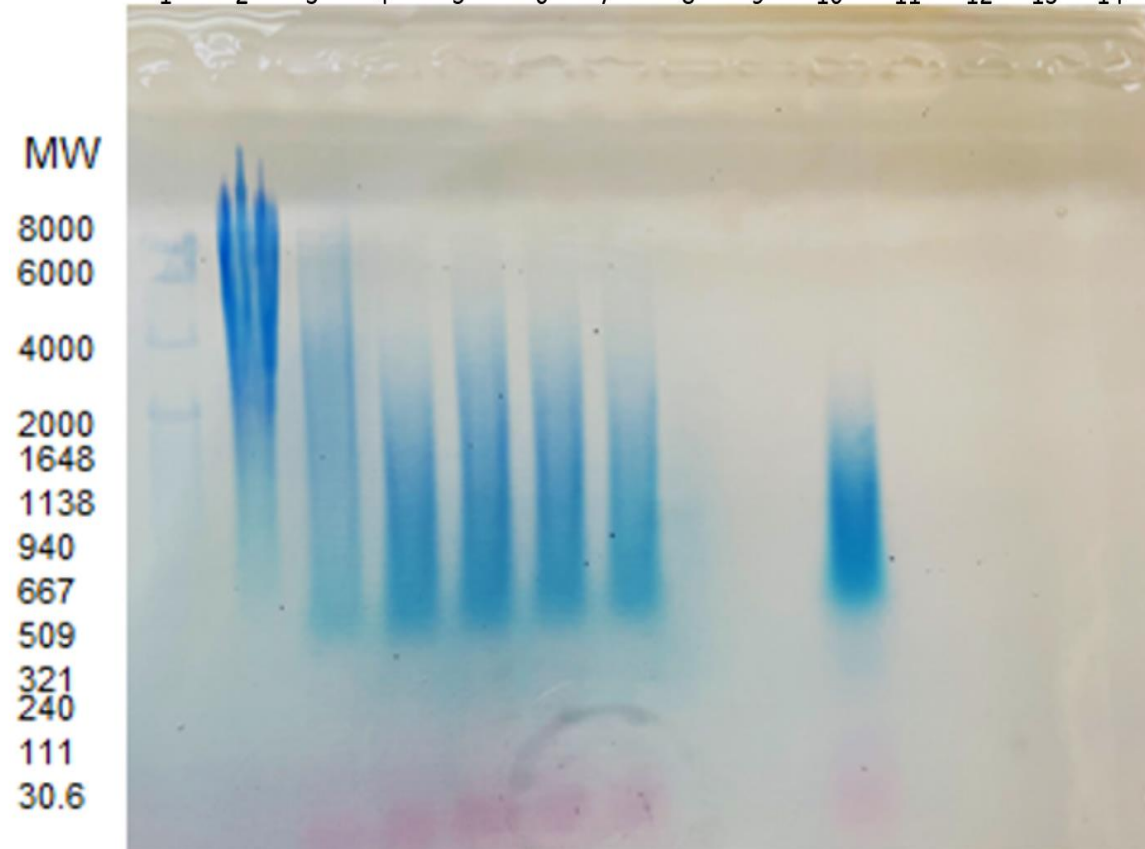

Lanes 1 – 3 are shown in Fig. S4B.  
Lanes 4 – 14 is cut off because the data is not included in the manuscript.

# Full unedited gel for Figure 3-figure supplement 1C

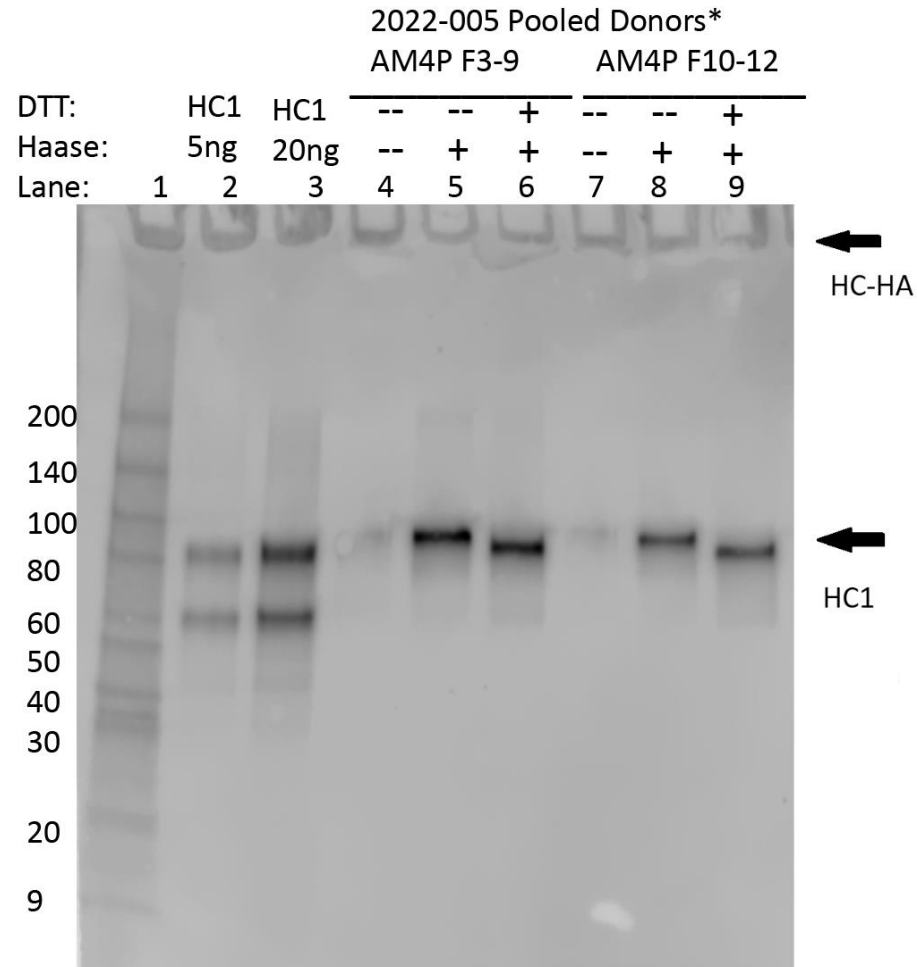

Lanes 1 – 6 are shown in Fig. S4C.  
Lanes 7 – 9 is cut off because the  
data of AM4P F10-12 is not included  
in the manuscript.

Exposure: 4 minutes

\*Pooled Donors: TGBK2022C018, TGRR22C035, TGSM22C009  
TGBA22C022, TXM22C013, TGJX22C021, TGBA22C023

# Full unedited gel for Figure 3-figure supplement 1D

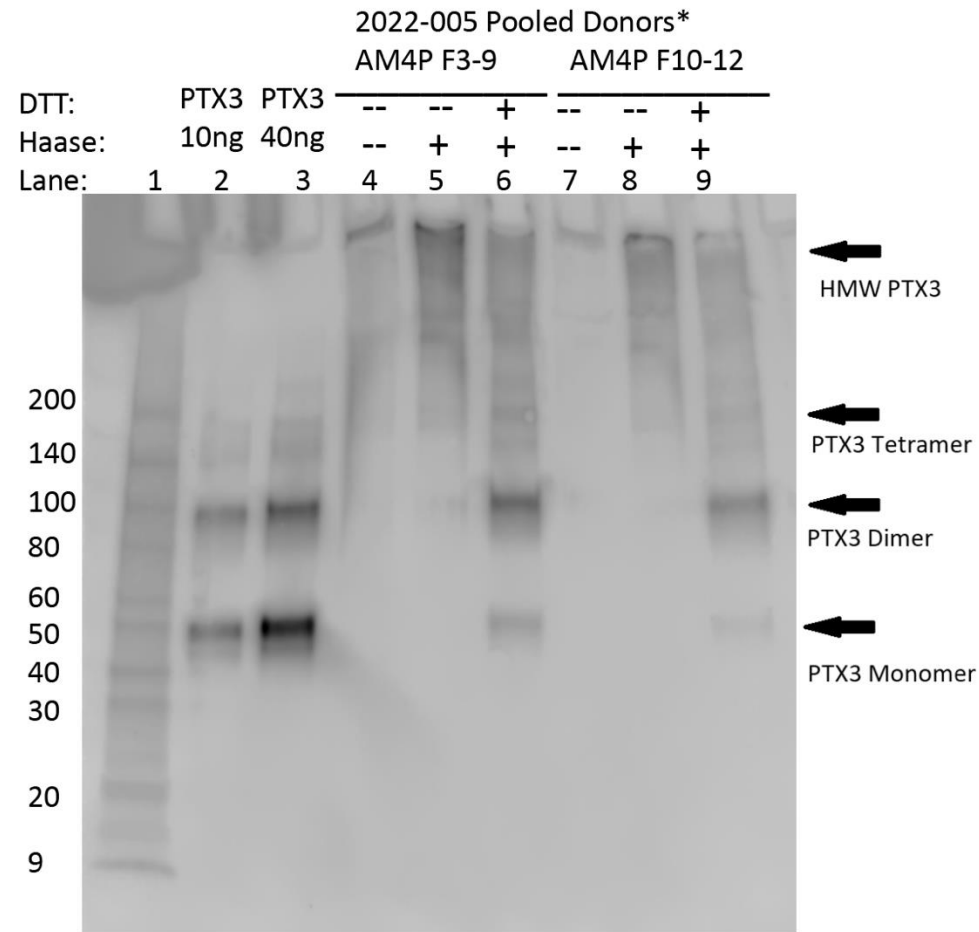

Lanes 1 – 6 are shown in Fig. S4D.  
Lanes 7 – 9 is cut off because the data of AM4P F10-12 is not included in the manuscript.

Exposure: 4 minutes

\*Pooled Donors: TGBK2022C018, TGRR22C035, TGSM22C009  
TGBA22C022, TXM22C013, TGJX22C021, TGBA22C023
