# Supplementary material for: Human birth tissue products as a non-opioid medicine to inhibit post-surgical pain
Source: eLife journal article supplement (doi:10.7554/elife.101269), 2024-09-09

# Full unedited gel for Figure 4-figure supplement 1B-CD44

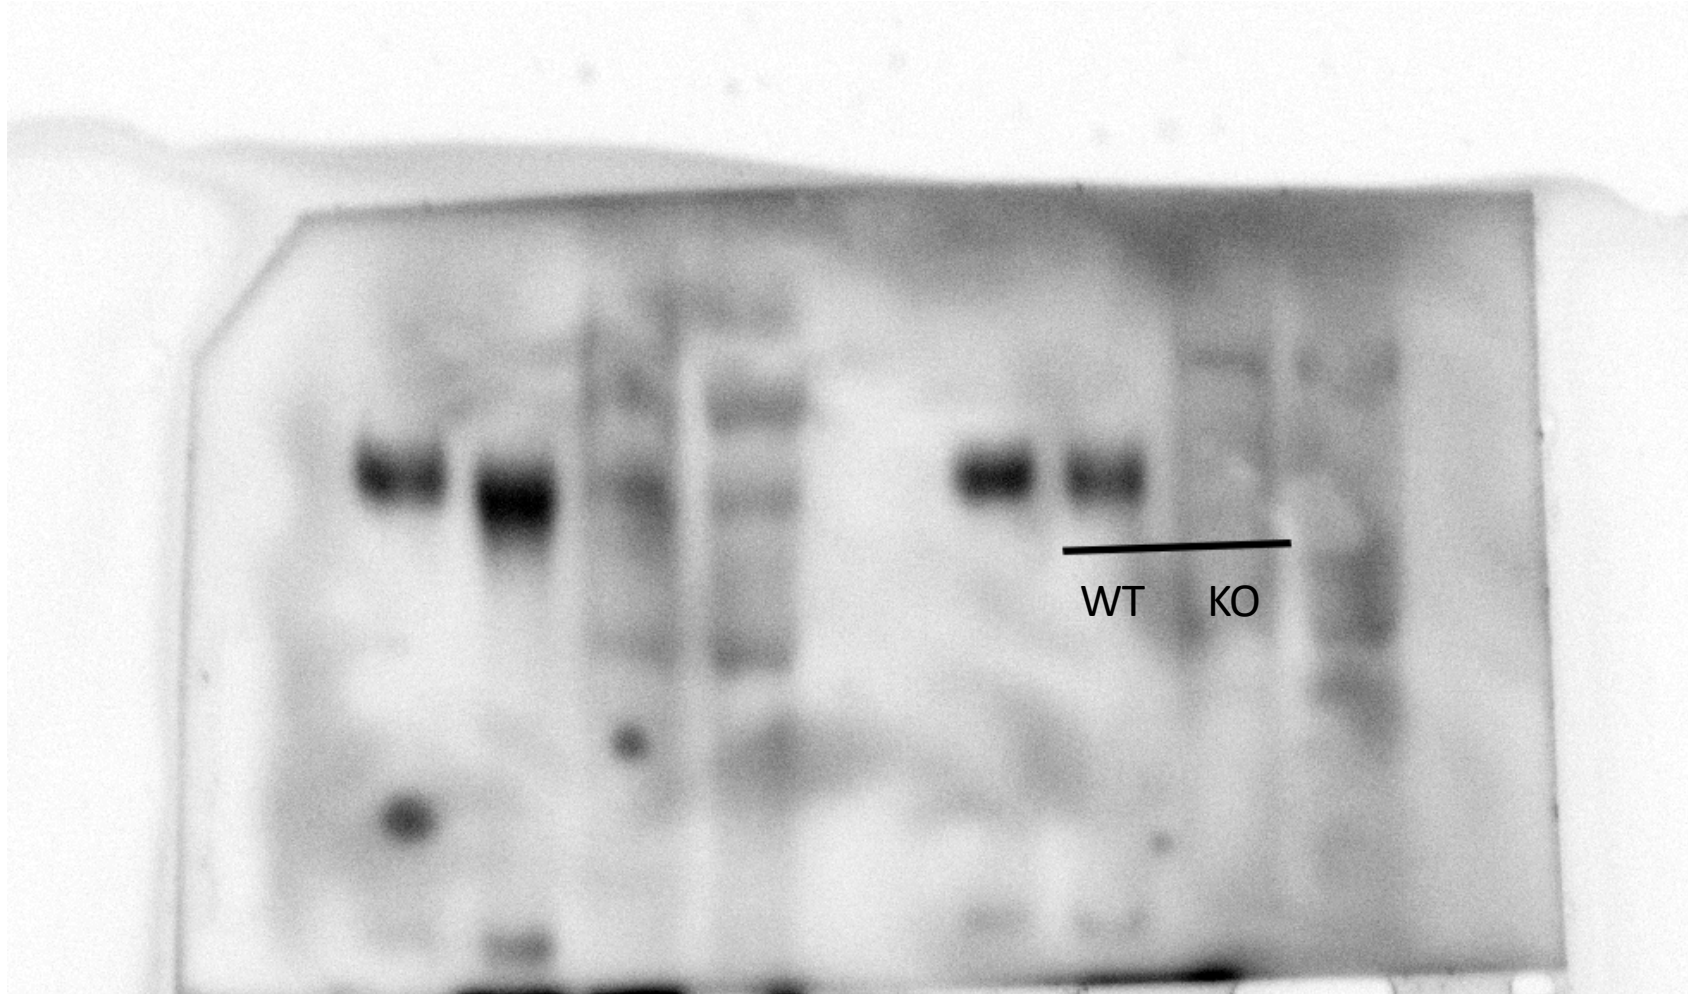

Supplement: fig4-figsupp1-data1 [file elife-101269-fig4-figsupp1-data1-v1.pdf]
