# Supplementary material for: Human birth tissue products as a non-opioid medicine to inhibit post-surgical pain
Source: eLife. 2024 Dec 13;13:RP101269. doi: 10.7554/eLife.101269 (PMC11643635; doi:10.7554/eLife.101269)
Supplement: Figure 1—source data 1. [file elife-101269-fig1-data1.xlsx]

## Sheet: Fig.1A
Fig.1A
Ipsilateral
	Vehicle											FLO
pre-drug	20.32	24.31	14.9567	9.59667	10.39	16.325	10.795	8.42	19.095	14.54		15.95	15.1833	14.4933	16.7533	17.365	14.36	13.31	11.23	13.08	10.06
1	14.0567	18.8933	12.4633	14.9467	9.97	11.7233	12.925	7.90333	12.5833	11.3233		19.3367	29.63	22.16	22.44	30	16.03	21.71	23.06	17.74	13.83
2	11.66	15.93	9.09333	12.7833	7.03333	7.81	9.77333	9.30333	15.1567	9.735		15.8933	15.46	13.58	14.295	19.21	18.6	25.45	24.045	17.24	19.485
4	17.4967	14.12	9.71667	14.21	10.07	19.29	12.5333	11.945	18.615	11.27		15.015	14.9867	10.8625	15.3933	21.2067	14.36	10.53	17.89	13.75	15.6
Contralateral
	Vehicle											FLO
pre-drug	14.5367	10.4633	15.2	10.9833	13.1467	17.56	14.13	8.2	10.53	12.53		13.5133	20.92	14.44	12.87	15.795	12.54	23.27	12.55	14.39	13.11
1	11.4267	22.8733	11.8367	18.815	14.88	14.23	16.93	10.04	13.52	10.81		16.4067	20.85	13.55	16.605	16.56	9.07	21.81	12.11	14.06	18.7
2	9.385	14.9233	11.1767	11.075	11.75	18.55	12.62	11.02	10.8	11.02		15.785	14.8	13.58	15.79	13.8	16.76	10.45	9.77	20.42	10.56
4	17.88	11.245	17.77	11.47	16.655	14.85	11.09	12.62	11.1	12.02		13.045	19.59	15.16	13.135	9.805	18.13	11.52	12.23	14.02	10.55

## Sheet: Fig.1B
Fig.1B
	Vehicle														FLO (0.1 mg)								FLO (0.5 mg)
baseline	17.77	12.995	12.885	16.355	13.91	12.8433	15.3267	11.7575	13.87	10.62	13.985	11.205	17.41		16.0033	16.39	13.4925	16.39	16.0033	14.65	9.7925		16.39	16.1833	9.7925	16.39	13.4925	12.225	14.065	13.815	10.885	10.74	12.49	18.64	10.865
0	2.99	7.32	3.98667	3.43667	5.72	6.48667	7.686	9.41	3.23333	1.86	3.27	6.4325	4.35		1.81333	4.86	2.66	5.88	3.68333	5.91333	11.7467		2.2	4.82333	2.20333	3.22	8.65	3.35	4.37	3.08	5.375	2.595	4.98333	5.79333	8.37
1	7.14	5.83	9.42667	3.50667	8.61667	7.85667	7.62667	7.26	6.59	2.52	3.20333	7.89	3.76		2.44333	18.56	3.95667	4.89333	5.195	13.9567	3.05333		10.7067	13.5167	4.17333	6.578	9.90333	6.09667	17.9133	5.19	6.66333	9.28	13.15	16.28	15.165
2	7.46	5.44	7.84333	2.64667	13.2567	7.562	3.62	3.93333	5.825	3.17	4.44	5.47	2.29		2.72	8.64333	7.29667	8.20333	4.6075	11.2	6.86333		15.48	15.2467	5.01333	15.34	4.808	5.235	10.55	3.71	4.29	5.455	6.28333	18.23	15.1167
4	10.38	7.59	2.565	5.205	2.31	7.98	10.2133	7.22	4.145	2.355	2.3	4.495	4.795		1.825	6.76	3.05	6.58333	7.25667	7.12333	4.35333		4.79	2.2	3.425	10.3033	6.18667	7.25	3.59	5.565	2.78	2.735	4.57	6.66	4.465

## Sheet: Fig.1C
Fig.1C
	Vehicle											FLO
Baseline	178	250	195.667	143.133	219.4	250	230.667	207	243.667	206		250	219.533	207	170.667	206	178	250	195.667	233	170.667	207.467
Pre-drug	137	164	103.333	57.2	57.8667	91.1333	92.8	140.133	138.133	126.133		66.3333	113.2	140.667	148	115.667	89.8	134.467	82.8	112.133	141.133	78.8667
Post-drug	152	157.667	140.333	47.2	75.5333	81.8	161.2	133.533	137.133	113.133		189.333	133.533	183.667	201.333	217.667	87.1333	205.467	216.467	125.467	161.8	166.867

## Sheet: Fig.1E
Fig.1E
Print area
	Vehicle															FLO
pre-injury	0.871375	0.915852	1.02714	0.775009	1.30934	1.13145	1.12031	1.13239	0.965676							0.906079	1.19191	1.34699	1.50245	1.05398	0.738558	1.02968	0.876619	0.843344	0.873853
pre-drug	0.20886	0.147558	0.045896	0.184	0.045086	0.206819	0.149358	0.212939	0.363999							0.033008	0.103566	0.063285	0.255545	0.127836	0.139673	0.042632	0.120804	0.282017	0.328943
post-drug	0.25894	0.16701	0.249175	0.237044	0.040497	0.119299	0.307948	0.611437	0.434725							0.037975	0.206198	0.606626	0.822953	0.515057	0.087669	0.090699	0.344988	0.420981	0.721838
Max contact area
	Vehicle																FLO
pre-injury	0.852475	0.974984	0.996696	0.749305	1.37952	1.14651	1.0998	1.14706	0.927498							0.893658	1.21769	1.296	1.5583	1.07189	0.741439	1.0152	0.874702	0.86206	0.958237
pre-drug	0.162068	0.140814	0.0458717	0.205513	0.0437023	0.234626	0.153808	0.220235	0.362653							0.0381939	0.0975027	0.0744241	0.28656	0.148617	0.158	0.04535	0.109659	0.272265	0.314128
post-drug	0.243714	0.172215	0.238701	0.236838	0.0474083	0.124171	0.299694	0.594996	0.438126							0.0429367	0.202442	0.633843	0.823004	0.529088	0.095865	0.10161	0.267929	0.311263	0.734551
Duty cycle
	Vehicle																FLO
pre-injury	0.979179	1.07088	1.04335	0.997942	1.08364	0.953865	1.09769	0.936723	0.966984							1.01656	0.992036	1.14415	1.15028	1.01801	0.949675	0.936956	0.942458	0.930404	0.957935
pre-drug	0.768352	0.364208	0.39142	0.61071	0.315493	0.610254	0.703844	0.70795	0.759362							0.239892	0.428732	0	0.589385	0.475312	0.21551	0.248995	0.568782	0.747899	0.712979
post-drug	0.812692	0.590125	0.660305	0.736311	0.13632	0.441949	0.792638	0.938663	0.793131							0.412121	0.593026	0.792092	0.946551	0.717579	0.299461	0.396936	0.854799	0.836745	0.860674

## Sheet: Fig.1F
Fig.1F
Total
	Vehicle												FLO
post-injury day 2	3814	3771	5449	4221	5159	5729	3354	4261	5993	3131			5996	5820	5478	4544	4084	3694	4423	3760	4466	3890
post-injury day 4	2864	3043	6701	4569	4417	4309	3754	2988	3909	2099			3782	5367	4115	4253	4297	3539	4680	3326	3993	2388
Center
	Vehicle
post-injury day 2	2922	2843	4663	3281	4509	5056	3177	3472	5224	2275			FLO
post-injury day 4	2423	2494	5443	3269	3717	3722	3108	2313	3384	1802			5002	5026	4669	3943	3272	3129	3711	3041	4113	2959
													2902	4825	3277	3636	3421	2771	4029	2408	3477	1777
Periphery
	Vehicle												FLO
post-injury day 2	892	928	786	940	650	673	177	789	769	856			994	794	809	601	812	565	712	719	353	931
post-injury day 4	441	549	1258	1300	700	587	646	675	525	297			880	542	838	617	876	768	651	918	516	611
