# Supplementary material for: Human birth tissue products as a non-opioid medicine to inhibit post-surgical pain
Source: eLife. 2024 Dec 13;13:RP101269. doi: 10.7554/eLife.101269 (PMC11643635; doi:10.7554/eLife.101269)
Supplement: Figure 2—source data 1. [file elife-101269-fig2-data1.xlsx]

## Sheet: Fig.2B
Fig.2B
	pre-injection											post-injection
small	19.0801	16.7488	22.0044	21.6107	20.1878	25.9328	15.7464	17.0149	21.519			18.7394	16.6348	22.8758	23.0872	23.3177	28.1716	15.9509	17.6119	20.6148
medium	2.2147	3.6946	2.3965	3.7584	3.5994	10.8209	5.317	9.403	5.24412			1.1925	3.0593	3.4858	2.6846	3.4429	9.3284	6.7485	7.9104	6.32911
large	0.3407	0.7389	1.5251	2.2819	0.939	5.597	1.4315	3.2836	1.08499			0.3407	0.5736	0.2179	0.6711	1.252	5.9701	2.045	3.5821	3.07414

## Sheet: Fig.2C
Fig.2C
	pre-injection											post-injection
small	22.8507	26.6272	18.5075	14.9362	18.1628	31.1475	15.2475	18.9422	14.4444			16.2896	17.5542	15.2239	11.6576	11.4823	18.9696	10.4951	13.4071	8.75
medium	3.1674	5.7199	3.2836	3.0965	3.5491	8.4309	6.73267	6.2731	6.80556			1.5837	3.5503	6.8657	2.3679	2.5052	6.5574	5.14851	4.428	4.58333
large	1.3575	1.1834	1.4925	0.3643	0.2088	2.5761	1.58416	1.353	2.36111			0.6787	0.3945	2.0896	0.3643	0.4175	2.1077	1.38614	0.984	0.972222

## Sheet: Fig.2D
Fig.2D
Pre-FLO
		cell 1	cell 2	cell 3	cell 4
6		1.00653	1.02016	1.02456	1.00884
12		0.993472	0.979845	0.975441	0.991157
18		1.01128	1.92381	1.14861	1.02618
24		7.55687	13.441	8.54471	7.39795
30		5.30168	12.2241	2.92632	9.86947
Post-FLO
		cell 1	cell 2	cell 3	cell 4
6		1.01069	1	1.05144	1.01702
12		0.989309	1	0.948561	0.982976
18		1.20217	3.8507	1.04272	3.93904
24		2.27286	1.61277	0.751962	1.29489
30		1.82256	1.20958	0.982999	1.00686
