# Supplementary material for: Human birth tissue products as a non-opioid medicine to inhibit post-surgical pain
Source: eLife. 2024 Dec 13;13:RP101269. doi: 10.7554/eLife.101269 (PMC11643635; doi:10.7554/eLife.101269)
Supplement: Figure 3—figure supplement 1—source data 3. [file elife-101269-fig3-figsupp1-data3.xlsx]

## Sheet: Fig.3-figure supplement 1E
Fig.3-figure supplement 1E
			HC-HA/PTX3 (ug/ml)
blank	negative	positive	25	6.25	1.56	0.39	0.098	0.024
0.1953	0.2322	0.9249	0.2043	0.4132	0.4767	0.5795	0.7929	0.9426
0.201	0.2396	0.9827	0.2068	0.4462	0.4987	0.5802	0.7755	0.9257
0.2022	0.2435	0.8793	0.4213	0.4846	0.5771	0.7092	0.9594	1.0169
