# Supplementary material for: Human birth tissue products as a non-opioid medicine to inhibit post-surgical pain
Source: eLife. 2024 Dec 13;13:RP101269. doi: 10.7554/eLife.101269 (PMC11643635; doi:10.7554/eLife.101269)
Supplement: Figure 3—figure supplement 2—source data 1. [file elife-101269-fig3-figsupp2-data1.xlsx]

## Sheet: Fig.3-figure supplement 2A
Fig.3-figure supplement 2A
	male							female
baseline	11.49	12.2858	13.375	17.46	12.69			10.4175	14.7892	14.335	13.8117	18.2742
0	3.76667	6.91667	3.54	7.1525	8.7725			4.15333	3.05333	4.14667	9.84	5.78
1	9.95333	17.38	8.36	17.1775	9.4625			12.4167	8.14	14.0867	12.9575	20.5233

## Sheet: Fig.3-figure supplement 2B
Fig.3-figure supplement 2B
male	female
80.104	131.91
194.88	43.343
49.009	97.563
97.259	78.493
17.613	118.002
