# Supplementary material for: Human birth tissue products as a non-opioid medicine to inhibit post-surgical pain
Source: eLife. 2024 Dec 13;13:RP101269. doi: 10.7554/eLife.101269 (PMC11643635; doi:10.7554/eLife.101269)
Supplement: Figure 3—figure supplement 3—source data 1. [file elife-101269-fig3-figsupp3-data1.xlsx]

## Sheet: Fig.3-figure supplement 3B
Fig.3-figure supplement 3B
Pre-drug	HHP
-67.8	-70
-72.44	-73.1
-71.4	-74.3
-75.5	-74.68
-80.5	-79.3

## Sheet: Fig.3-figure supplement 3D
Fig.3-figure supplement 3D
Pre-drug	HHP
550	500
1700	1700
750	650
900	900
1000	900

## Sheet: Fig.3-figure supplement 3E
Fig.3-figure supplement 3E
Pre-drug	HHP
-42.27	-40.2
-32.65	-26.1
-20.35	-34.2
-40.1	-40.4
-44.8	-44.5

## Sheet: Fig.3-figure supplement 3F
Fig.3-figure supplement 3F
Pre-drug	HHP
83.89	83.3
57.99	34.5
76.99	85.3
77.8	84.9
78.7	79.2

## Sheet: Fig.3-figure supplement 3G
Fig.3-figure supplement 3G
Pre-drug	HHP
2.3	1.9
1.8	1.8
2.6	2.7
2.1	2.1
1.7	1.6

## Sheet: Fig.3-figure supplement 3H
Fig.3-figure supplement 3H
Pre-drug	HHP
36.3	30.6
79	91
51	66
47	61
