# Supplementary material for: Human birth tissue products as a non-opioid medicine to inhibit post-surgical pain
Source: eLife. 2024 Dec 13;13:RP101269. doi: 10.7554/eLife.101269 (PMC11643635; doi:10.7554/eLife.101269)
Supplement: Figure 3—source data 1. [file elife-101269-fig3-data1.xlsx]

## Sheet: Fig.3A
Fig.3A
Left: WT (naive)
	Vehicle											HHP (10 ug)													HHP (20 ug)
pre-drug	13.58	12.35	11.55	18.11	15.87	12.42	14.24	13.25	13.76			13.65	12.33	14.98	11.86	16.55	15.5	9.22	14.92	14.92	12.17	9.53			15	10.84	15.55	13.25	15.88	14.56	14.33	10.95
1	9.65	9.62	14.89	13.4	13.74	14.75	9.94	14.98	13.16			20.03	8.34	22.27	21.41	27.33	25.04	14.84	18.21	14.81	24.76	18.26			22.3	30	20.75	26.97	16.44	20.89	20.16	30
2	9.71	11.74	15.38	16.6	15.27	6.35	9.64	15.93	13.03			12.39	11.16	18.95	25.39	14.43	15.73	12.31	28.65	14.14	23.16	14.66			25.07	26.21	16.39	25.78	18.7	19.77	26.32	25.32
4	15.3	16.34	8.43	16.82	19.04	9.72	12.16	11.87	12.43			13.89	15.56	17.29	17.69	9.37	12.72	21.77	10.9	10.53	18.28	9.72			16.52	15.86	14.02	19.12	14.97	24.34	14.6	16.16
Right: WT (incision)
	Vehicle																		HHP (10 ug)														HHP (20 ug)
baseline	17.77	20.89	15.99	12.995	12.885	17.6467	16.355	13.91	12.8433	15.3267	11.7575	13.87	10.62	13.985	11.205	17.41			11.49	12.2858	10.4175	14.7892	14.335	13.375	17.46	12.69	13.8117	18.2742			16.48	15.725	15.0067	19.85	16.6633	15.725	15.0067	19.85	16.6633
0	2.99	12.09	10.44	7.32	3.98667	9.94667	3.43667	5.72	6.48667	7.686	9.41	3.23333	1.86	3.27	6.4325	4.35			3.76667	6.91667	4.15333	3.05333	4.14667	3.54	7.1525	8.7725	9.84	5.78			5.9	4.15333	6.7	4.575	7.365	3.66	4.97667	7.04	2.17
1	7.14	4.61	12.24	5.83	9.42667	10.6267	3.50667	8.61667	7.85667	7.62667	7.26	6.59	2.52	3.20333	7.89	3.76			9.95333	17.38	12.4167	8.14	14.0867	8.36	17.1775	9.4625	12.9575	20.5233			17.2025	23.5775	15.7025	11.4675	19.164	12.7	9.87	18.445	16.3675
2	7.46	5.79	8.53	5.44	7.84333	5.30333	2.64667	13.2567	7.562	3.62	3.93333	5.825	3.17	4.44	5.47	2.29			7.955	7.91	15.6267	4.16	11.33	6.725	10.2233	11.6967	12.85	14.074			17.3	7.43333	10.5533	18.46	15.8467	6.99333	14.7233	17.6867	14.4833
4	10.38	7.43	7.87	7.59	2.565	2.895	5.205	2.31	7.98	10.2133	7.22	4.145	2.355	2.3	4.495	4.795			6.015	8.53	3.885	10.955	6.01	5.12667	9.56667	6.71	5.72667	7.57			10.7533	11.2067	3.64	12.9733	22.3267	6.345	9.825	10.095	8.91

## Sheet: Fig.3B
Fig.3B
Left: WT (incision)
	Vehicle							HMW-HA (20 ug)											HMW-HA (20 ug) + HC1 (720 ng)											HC-HA/PTX3 (20 ug)
baseline	13.395	11.75	15.8033	17.74	11.19			13.97	16.16	16.47	17.395	13.395	11.75	10.215	12.995	19.375			16.68	15.8033	17.74	18.14	11.19	15.8033	17.74	12.995	19.375			17.975	14.49	19.98	17.09	19.3267	10.875	13.83
0h	4.25333	9.9125	3.36	4.70667	4.83			7.495	6.085	10.71	10.0125	9.7275	4.01333	3.71333	4.24667	6.39333			4.82333	3.09333	7.665	7.74	3.76	5.65667	6.34333	11.7633	7.99			8.95667	6.325	6.14	5.955	6.865	6.585	10.2075
1h	2.9525	7.486	7.048	7.32	5.074			15.89	14.45	8.17333	24.9625	19.2275	5.8975	7.5675	7.28333	8.79333			12.942	8.575	18.575	14.0267	7.21667	9.096	17.2725	19.32	14.1625			22.0933	15.4733	14	13.2367	17.852	23.0433	16.86
2h	6.18667	4.76333	2.84667	11.81	4.64			13.0967	8.92333	13.375	11.6833	12.975	9.36333	4.49	10.8967	9.32667			4.855	12.1433	12.6725	8.1	4.48	7.2325	9.315	10.336	12.6175			12.085	12.8033	17.07	12.5633	10.2467	17.95	20.1467
4h	4.17333	6.74667	3.51	5.675	3.89333			12.9475	10.2925	8.96333	8.78667	3.095	8.225	6.84	8.71	4.31			4.26667	4.6	2.9	9.46667	4.29	5.97	8.0775	6.13333	14.29			12.85	9.8375	12.76	12.395	10.5825	17.46	19.69
Right: Area Under Curve
saline	HMW-HA (20 ug)	HMW-HA (20 ug) + HC1 (720 ng)	HC-HA/PTX3 (20 ug)
1.522	22.25	8.136	21.72
-13.32	16.83	20.56	22.38
3.0344	-0.285	13.657	30.88
14.24	16.75	8.553
-0.9774		5.067	23.63
	7.738	6.116	19.78
	14.12	17.12	44.38
	8.146	-0.215	31.04
	17.48	19.41
	4.7168

## Sheet: Fig.3D
Fig.3D
Vehicle
152.259	172.742	94.0437	105.151	79.1974	114.972	29.4994	142.753	95.9361	88.8916	188.5	27.9756	97.9087	89.4994	102.171	64.4305	75.3778	62.4975	109.012	111.162	60.6432	81.7652	91.6193	144.514	92.0861	171.653	96.9551	109.043	89.9811	112.694	150.776	143.364	122.161	64.7184	89.5565	105.7	78.3775	36.5718	78.6662	41.3714	140.274	25.3152	127.854	92.0881	71.8478	119.053	89.7862	122.092	113.941	120.383
HC-HA/PTX3
86.3308	86.6536	79.2519	109.213	85.7484	79.3845	79.8362	37.8278	77.8699	64.7209	35.0232	73.1754	96.2406	61.8514	80.8627	47.6057	49.9965	39.3595	74.2657	74.1308	111.343	94.2448	78.0903	82.6306	117.256	84.1644	130.401	77.3656	131.3	162.079	102.66	95.136	102.481	107.506	70.9802	99.1311	108.645	101.732	75.0444	90.7789	98.7814	67.0691	99.6963	134.628	92.1865	98.9237	83.9169	90.3209	71.4892	79.0661
HMW-HA
76.0384	89.5012	44.3198	88.7939	13.5563	75.6382	25.8724	40.3378	13.0807	88.0045	62.3047	11.7112	78.9113	93.7065	23.8102	14.2111	89.6577	90.7237	87.2466	14.0744	80.1628	102.46	161.187	74.6803	44.9394	88.1756	15.4291	21.444	88.4536	36.7208	87.9945		50.6897	99.7203	84.9591	83.0802	97.7387	84.739	88.4746	178.869	133.758	127.367		89.096	200.085	137.791	175.329	15.7523	194.785	18.6136
[truncated: 120 more columns]

## Sheet: Fig.3E
Fig.3E
vehicle
98.1024	108.446	64.2702	49.8345	95.4156	73.0415	86.8584	96.744	47.6836	76.0208	83.23	202.257	114.087	164.032	104.945	91.4163
HC-HA/PTX3
11.4719	27.0573	2.0227	4.3232	3.25271	2.71178	2.75184	14.5655	20.3507	2.98494	177.702	4.08162	32.0624	61.8742	34.7769	161.183

## Sheet: Fig.3F
Fig.3F
Vehicle
303.319	88.5993	251.164	238.428	88.3488	233.849			145.453	188.457	284.196	122.392	16.0416	179.096	15.482	14.8498	12.6716	59.5748	67.0972	73.8852	37.978	129.842	35.0176	9.65968	220.769	37.2057	109.215	56.6991	7.75147	70.128	41.8237
HC-HA/PTX3
10.047		3.24234	38.0005	7.19526	34.4462	40.2349	79.192	167.257	44.148	28.2462	146.859	68.4574	121.691	70.431	58.858	78.0922	78.4559	63.3019

## Sheet: Fig.3I
Fig.3I
	Pre-drug									HC-HA/PTX3
Veh.	-50.14	-68.5	-55.56	-54.1						-49.14	-69.81	-53.47	-55.6
5 g/mL	-56.3	-60.5	-59.3	-60.7	-60.3	-59.2	-59.8			-53.5	-82.6	-53.4	-63.3	-62.1	-64.6	-91.2
10 g/mL	-56.7	-60.5	-61.4	-59.5	-61.3	-59.5	-55.6			-60	-65.9	-76.7	-101.7	-98.4	-87.8	-74.3
25 g/mL	-59.1	-58.3	-60.23	-59.8	-61.5					-86.5	-68.7	-94.3	-76.4	-83.5

## Sheet: Fig.3J
Fig.3J
	Pre-drug								HHP
Veh.	1	1	1	1					1	1	1	1
5 g/mL	1	1	1	1	1	1			1.2	1.71429	1	1.2	1.16667	1
10 g/mL	1	1	1	1	1				1.375	2	2.5	2	1
25 g/mL	1	1	1	1	1				1.44444	1.57143	1.8	1.875	1.375
