# Supplementary material for: Human birth tissue products as a non-opioid medicine to inhibit post-surgical pain
Source: eLife. 2024 Dec 13;13:RP101269. doi: 10.7554/eLife.101269 (PMC11643635; doi:10.7554/eLife.101269)
Supplement: Figure 4—source data 1. [file elife-101269-fig4-data1.xlsx]

## Sheet: Fig.4A
Fig.4A
a, b, c																d
IB4					CGRP					NF200						100	0.211416
	CD44	Co-	IB4			CD44	Co-	CGRP			CD44	Co-	NF200			200	5.70824
	90	29	29			74	23	25			39	14	15			300	14.1649
	63	21	21			42	1	14			32	8	9			400	19.4503
	62	18	21			55	25	26			22	7	9			500	12.8964
	23	12	12			34	14	16			9	5	8			600	13.3192
	37	18	18			18	8	8			15	7	9			700	7.39958
	28	13	15			40	12	14			11	7	9			800	6.55391
	57	30	32			18	5	6			8	4	4			900	7.82241
						29	10	11			91	27	32			1000	4.22833
						45	16	18			11	4	5			1100	2.74841
						33	12	13			18	4	6			1200	1.90275
						37	12	12			24	4	5			1300	2.11416
						18	5	5			30	9	11			1400	1.47992
						39	14	16			54	5	7
											45	8	10
											43	6	9
	360	141	148			482	157	184			452	119	148
367	219	141	7		509	325	157	27		481	333	119	29
	59.673	38.4196	1.90736			63.8507	30.8448	5.30452			69.2308	24.7401	6.02911

## Sheet: Fig.4B
Fig.4B
	group1	group2	statistic	df	p	p.adj	p.adj.signif					group1	group2	statistic	df	p	p.adj	p.adj.signif
1	NF1	cLTMR	14.4108	592.969	1.39e-40	1.08e-38	****				1	NF2	cLTMR	6.64195	234.625	2.13e-10	1.66e-08	****
11	NF1	SGC	-7.01213	462.349	8.37e-12	6.53e-10	****				11	NF2	SGC	-3.91108	487.182	0.000105	0.008	**
10	NF1	NF2	-2.9701	321.564	0.003	0.25	ns				6	NF2	NF1	-2.9701	321.564	0.003	0.25	ns
12	NF1	NP1	-4.66701	362.21	4.31e-06	0.000336	***				12	NF2	NP1	-1.24395	363.488	0.214	1	ns
3	NF1	NP2	71.771	679.87	1.76001005018027e-319	1.3700000640753e-317	****				3	NF2	NP2	47.2581	253.592	1e-127	7.8e-126	****
6	NF1	NP3	-44.8058	769.865	1.08e-216	8.42e-215	****				7	NF2	NP3	31.597	358.775	1.1e-105	8.58e-104	****
2	NF1	PEP1	50.8401	656.328	8.7e-230	6.79e-228	****				2	NF2	PEP1	32.2638	247.188	1.39e-90	1.08e-88	****
7	NF1	PEP2	-32.2525	802.666	5.08e-147	3.96e-145	****				8	NF2	PEP2	20.4162	291.329	3.93e-58	3.07e-56	****
9	NF1	PEP3	-47.8383	620.753	2.17e-210	1.69e-208	****				10	NF2	PEP3	29.8388	239.255	1.34e-82	1.05e-80	****
8	NF1	PEP4	-43.842	789.339	1.02e-213	7.96e-212	****				9	NF2	PEP4	28.9671	293.939	4.08e-88	3.18e-86	****
4	NF1	PEP5	8.87336	705.483	5.79e-18	4.52e-16	****				4	NF2	PEP5	3.12729	263.315	0.002	0.153	ns
5	NF1	PEP6	6.96072	308.379	2.04e-11	1.59e-09	****				5	NF2	PEP6	3.51427	359.561	0.000497	0.039	*

## Sheet: Fig.4E
Fig.4E
Vehicle-CD44 KO	54.6401	68.3071	48.4108	71.4392	75.1769	42.5544	58.8073	59.4969	26.306	38.9684	88.4312	17.5983	24.0353	125.883	36.459	101.865	112.397	29.6417	77.626	20.045	57.5348	34.0347	25.6633	44.5683	65.5323		65.1899	85.39	13.1243	39.0226	54.8776	36.3877	66.6321	26.8456	24.973	21.9711	181.297	221.596	55.7108	61.5812	112.065	36.1475	37.9618			98.9925	17.499		90.7305
HC-HA/PTX3-CD44 KO	117.615	9.88217	17.6077	25.121		14.9509	58.8561	72.1346	28.7768	93.2895	66.2653	81.6499	19.1649	30.5035	88.8278	35.0355	44.3863	367.024	29.3341	39.5977	28.0676	94.6309	55.4046	71.0123	74.7549	121.508	83.0258	63.6291	52.0999	10.0159	20.4157	44.3453	61.5196	14.7035	37.9812	110.883	36.6798	104.111	107.293	69.6995	11.6878	138.171	100.578	93.6262	22.2919	80.1359	18.3527	50.0553	76.4376
[truncated: 163 more columns]

## Sheet: Fig.4F
Fig.4F
Pre-drug	HHP
-61.7	-58.8
-56.8	-62.5
-62	-54.7
-61.7	-53.5
-61.7
-61.2	-59.9
-59.64	-62.6
-57.69	-59.15
-58.35	-59.68
-58.6	-59.58

## Sheet: Fig.4G
Fig.4G
b			c			d			e
Rheobase			AP threshold			AP amplitude			AP 50
Pre-drug	HHP		Pre-drug	HHP		Pre-drug	HHP		Pre-drug	HHP
225	225		-24.23	-25.98		62.88	67.17		8.9	9.3
			-22.34	-22.49		40.56	56.6		6.3	6.2
250	250		-19	-19.6		21.3	24.6		10.9	10.4
125	125		-34.67	-34.95		37.33	35.15		8.2	8.7
200	125		-33.88	-35.38		32.62	38.74		8.1	8.2
200			-32.8			46.4			13.7
125			-30.1			73.3			8.3
200	250		-26.7	-35.1		21.8	28.4		6.5	6.5
75	125		-32.4	-18.6		50.1	41.9		14	16.1
125			-35.6			82.4			8.3
200	275		-30.8	-43		53.3	77.7		9.3	5.4

## Sheet: Fig.4H
Fig.4H
	Vehicle									FLO
baseline	13.8775	11.34	16.6	13.6267	16.33	17.0333	11.8067	13.6367		15.1333	16.33	17.0333	11.8067	13.6367	13.8775	11.34	15.1333	13.6267
0	4.525	8.5	5.155	1.92667	4.46667	5.63333	2.01	8.47		10.17	2.75	5.24333	1.97333	3.60667	5.13333	2.83	6.98	5.73667
1	4.65333	4.33	4.77	3.25	11.5167	6.41333	1.97333	8.14		1.87333	6.14333	2.13	1.69333	1.52667	7.39333	3.68667	8.60667	12.12
2	4.95	5.555	7.51333	6.0475	5.22333	6.89	1.49	6.38		1.88333	11.0175	5.60667	1.44667	3.09667	3.92	3.50333	5.33	13.0533
4	3.575	5.305	7.72	3.055	5.67	8.29	1.515	3.11		1.835	6.445	4.76	2.53	6.4	2.93	6.15	7.205	6.11

## Sheet: Fig.4I
Fig.4I
	CD44 KO (20 ug)									CD44 KO (10 ug)											CD44 KO (Vehicle)
baseline	15.02	15.9833	21.0525	14.105	16.755	15.02	16.755			16.515	14.86	13.2	17.945	14.145	13.6633	13.865	16.515	14.86			13.8775	11.34	16.6	13.6267	16.33	17.0333	11.8067	13.6367
0	3.73667	4.18	2.99667	5.59	5.20667	3.04	3.70667			6.07667	2.64667	6.76	2.93333	2.87	9.52333	2.4	4.18333	3.35			4.525	8.5	5.155	1.92667	4.46667	5.63333	2.01	8.47
1	2.2675	6.42667	7.21	14.0675	3.54667	3.26667	7.79333			3.25667	3.14	1.56333	5.39333	4.48333	3.64667	3.15333	5.53333	5.77667			4.65333	4.33	4.77	3.25	11.5167	6.41333	1.97333	8.14
2	3.23333	7.8675	1.90667	6.7925	3.45	6.56667	9.41333			4.19667	2.12333	3.81333	3.22	6.24333	2.51667	3.70333	3.86333	4.06			4.95	5.555	7.51333	6.0475	5.22333	6.89	1.49	6.38
4	8.57667	5.87	3.64	8.64333	4.21	3.855	5.27			4.355	4.09	2.11667	5.605	6.185	5.915	4.195	4.065	3.855			3.575	5.305	7.72	3.055	5.67	8.29	1.515	3.11

## Sheet: Fig.4J
Fig.4J
	saline+control IgG											saline+CD44 IgG											HC-HA/PTX3+control IgG											HC-HA/PTX3+CD44 IgG
baseline	10.88	13.1	10.915	16.9067	19.695	14.76	20.6967	16.48			14.295	13.1867	10.88	13.1	14.49	12.6933	16.0767	20.6967			19.695	14.49	14.76	17.34	16.9833	13.2867	13.5733	16.41	16.1367	20.49	16.84			12.3433	12.2933	16.41	16.1367	20.49	16.84	17.34	16.9833	13.2867	13.5733
0	3.73667	2.35667	2.17667	3.27	2.75	2.43	4.92667	2.66333			2.58	3.12333	2.16667	6.42333	3.01333	2.97667	3.01667	5.79667			3.3875	2.0925	6.54667	2.89	4.94	3.84	3.56	5.88333	5.58	9.63667	3.92333			3.27667	10.4	4.44	2.28	1.84	1.99333	4.24667	11.51	4.02	1.89667
1	3.33667	2.06	1.87333	4.64	4.43	2.30333	7.63333	3.30667			4.15	3.8	3.04667	6.28	5.3	3.53	4.30333	6.94			15.0933	12.5725	9.315	22.1233	18.8233	1.85333	2.64667	13.015	13.354	9.352	13.195			3.85	5.42333	7.3	4.87667	1.86	2.71667	3.85333	13.15	5.11	5.21667
2	2.52333	3.23333	2.07333	3.15	3.73667	4.64	5.29667	2.73667			4.46333	2.64667	2.63667	2.96	3.8	2.39333	3.1	3.54			21.3233	9.96	11.36	16.51	9.3425	2.46667	2.88333	18.1467	19.13	13.5967	6.78667			2.65667	2.45	7.66333	5.35	3.72	2.82	6.94	10.7133	4.58	2.22667
4	3.705	3.5	1.81	6.01	4.07333	4.59333	4.73667	2.63			2.81	5.265	4.275	1.995	4.00667	4.43667	4.07667	6.285			4.41333	6.00667	3.98	4.48333	5.56	5.01333	2.79667	4.04	3.16	4.31	2.525			1.97	3.365	2.69333	4.16667	2.01333	4.00333	4.86	2.985	3.11	2.73
