# Supplementary material for: Human birth tissue products as a non-opioid medicine to inhibit post-surgical pain
Source: eLife. 2024 Dec 13;13:RP101269. doi: 10.7554/eLife.101269 (PMC11643635; doi:10.7554/eLife.101269)
Supplement: Figure 5—figure supplement 1—source data 1. [file elife-101269-fig5-figsupp1-data1.xlsx]

## Sheet: Fig.5-figure supplement 1A
Fig.5-figure supplement 1A
F-actin
vehicle-small	HHP-small	vehicle-medium	HHP-medium	vehicle-large	HHP-large
30.8114	78.8889	23.9635	37.3871	14.5404	30.8777
33.7855	73.633	32.1708	20.0977	14.9419	25.4241
35.7133	65.8403	34.6289	54.2082	9.9523	22.3734
37.6785	71.2673	24.6156	26.3644	11.0893	26.1849
36.6033	69.9968	23.2929	23.9881	16.9352	19.1996
28.2061	65.9811	37.5576	24.4841	17.5149	15.1372
31.4342	50.7148	33.9272	25.1144	9.3583	21.5819
34.9451	70.6918	31.3496	67.9742	21.5351	26.3898
44.6432	73.2249	24.8353	35.1588	21.7621	13.7992
34.5538	46.8898	29.9288	26.5974	21.0974	19.1584
26.9418	56.7401	31.7368	31.6514	24.6427	22.9892
24.8422	46.6151	24.8929	24.6745	19.7065	22.12
25.245	63.4879	20.7168	33.8472	16.2589	18.3083
26.5446	63.0341	25.8213	33.2085	25.0678	20.286
34.4966	64.1274	52.0217	9.11375	25.9732	23.0128
20.6452	78.9461	27.5617	28.2955	20.0758	18.9053
30.8575	41.0581	35.8147	24.3506		20.4205
33.6621	64.7032	19.5534	23.8799		12.4762
34.7001	56.0515	16.5637	39.8155		17.2123
28.7184	62.3863	14.3596	40.9587		8.2279
42.2105	50.1595	37.9423	25.8759		21.5652
16.358	53.1153	31.097	24.6794
39.4027	43.7194	30.4692	22.2903
26.4694	48.209	23.1063	27.9218
45.1693	49.0628	15.4827	34.0181
18.9568	51.9287	31.2915	34.9652
31.4194	67.0649	18.9396	18.2105
38.7729	54.63	26.5561	29.1245
30.0711	41.3739	42.4416	16.1693
29.0999	53.4628	26.308	19.5935
37.223	48.3784	20.6982	12.9947
30.7397	53.206	29.5367	24.4142
41.3408	43.1527	30.6371	18.4232
30.5386	48.7617	23.1417	30.9132
39.1209	40.6265	42.7679	20.5185
9.6792	33.1297	21.4472	29.5876
26.8732	44.3531	31.6223	38.849
29.9816	58.0127	25.4055	22.025
27.1553	42.445	28.6634	30.4531
33.6561	51.2358	33.3164	33.5849
19.8128	40.6439	26.6403	23.315
30.8217	53.4692	28.6828	23.5938
19.0615	55.9709	24.3595
16.6686	72.1066	23.2763
18.2045	66.2321	25.372
30.7785	43.5453	17.7432
31.6838	47.3202	23.8969
28.0674	41.9597	15.4456
33.0179	31.2047	20.8129
32.5362	64.4814	27.4281
13.0903	77.4582	28.9487
11.7478	43.3582	24.7186
29.401	21.5878	42.5023
19.0361	9.778
21.4717	49.5518
31.2971	53.193
34.3984	70.816
21.7742	50.4978
32.3923	45.3048
19.8368	39.5194
32.3403	52.0221
22.6255	40.6905
41.4667	55.5434
19.5785	45.2405
24.9131	58.6639
29.3613	60.4873
20.0447	31.9288
32.9781	50.5651
26.7006	51.723
26.3607	26.166
23.1031	46.4872
37.3776	60.2092
31.5164	49.3074
31.5481	53.5789
28.8839	48.2168
17.6982	51.9045
37.3987	48.7182
	50.5179
	45.9697
	70.4811
	49.4771
	48.6209
	52.1651
	39.6988
	20.156
	46.8453
	56.1919
	38.2968
	52.0616
	46.2294

## Sheet: Fig.5-figure supplement 1B
Fig.5-figure supplement 1B
CD44
vehicle-small	HHP-small	vehicle-medium	HHP-medium	vehicle-large	HHP-large
35.028	77.473	17.8321	41.2019	18.23	28.1674
32.4627	69.4854	36.6849	15.3268	17.4547	26.9328
39.1704	66.8263	38.8088	51.7405	10.741	23.8466
39.1424	71.9072	29.6258	25.7025	11.017	26.7936
31.8338	69.2606	23.4534	21.5815	14.8659	17.6054
20.0266	68.3366	25.2474	25.483	18.8695	21.1816
40.1128	53.3933	41.4542	26.3465	12.1572	20.9882
34.7951	75.2219	32.901	61.8194	20.0949	32.386
43.5024	72.4948	24.7985	38.086	24.0525	15.3197
33.6701	45.6658	32.9718	28.7056	19.7815	24.3151
22.7527	55.6297	30.191	28.6491	24.7034	26.2621
19.6851	44.6016	24.3794	22.5318	24.3195	29.5905
23.3619	63.5943	24.5429	34.3832	14.1711	29.1403
22.3745	55.4201	28.317	29.5863	28.4323	17.5774
28.1688	64.5251	43.6907	9.91164	27.381	22.9683
22.2097	74.7745	28.9338	27.1926	27.5247	13.8324
34.5509	33.0967	37.3311	19.2795		19.7865
47.2286	69.6186	23.8774	28.0427		11.98
45.6911	55.9017	22.051	34.2848		25.0607
29.0803	59.7679	14.8988	43.1478		12.423
39.6563	51.3111	36.3551	31.4965		22.3103
15.2812	37.7169	27.245	26.3382
39.3115	44.5548	28.6321	22.0359
26.5012	46.1642	22.3631	29.9428
44.8568	41.1195	22.4278	34.6177
29.0321	53.6425	34.4202	45.0648
27.2435	59.9656	21.2754	22.7568
36.6345	53.6882	28.1638	32.3556
33.0228	52.1482	42.6607	13.5313
36.8049	49.6295	20.0449	23.3435
44.955	58.611	24.4128	17.5941
38.7948	50.2357	29.4798	30.3692
44.9822	48.2087	37.8517	25.1796
23.3569	43.7701	22.3687	32.5228
41.0329	43.1968	48.7252	27.7079
5.4049	34.7556	19.8204	26.9728
33.6766	46.1096	30.7308	27.3256
37.6487	54.4644	26.7346	25.0022
29.9186	44.5343	26.4073	31.5704
40.486	54.9088	39.8366	38.1875
21.476	33.343	28.3559	21.5431
27.5677	59.061	37.6089	21.9051
22.4152	54.8419	23.5711
21.8368	69.594	27.975
16.4663	65.3867	27.235
30.8915	53.097	18.6547
35.7602	50.0996	26.065
34.9399	41.3043	13.4687
33.6762	36.3462	21.441
35.4937	35.5038	32.9945
30.2277	72.1847	31.3852
14.9683	42.7272	25.2612
36.1871	23.1438	42.2128
17.191	12.4162
25.6519	53.0577
33.9269	54.3759
39.84	68.03
24.6329	55.5375
35.4096	44.1313
21.6846	39.6676
32.8807	48.5574
25.2316	42.6438
44.9914	58.9807
21.5401	52.5479
27.1249	60.8155
26.7055	59.7318
24.1302	36.0625
32.2118	48.1257
27.3816	56.157
26.5436	21.1673
23.1635	54.9154
40.482	70.4114
29.815	52.9278
31.2077	59.0326
34.0461	48.9227
22.4656	53.8951
33.0665	52.642
	57.4093
	55.6055
	69.3758
	47.62
	49.5026
	55.2244
	47.6376
	29.059
	71.7332
	58.8886
	39.7809
	53.7039
	48.9729
