# Supplementary material for: Human birth tissue products as a non-opioid medicine to inhibit post-surgical pain
Source: eLife. 2024 Dec 13;13:RP101269. doi: 10.7554/eLife.101269 (PMC11643635; doi:10.7554/eLife.101269)
Supplement: Figure 5—figure supplement 2—source data 1. [file elife-101269-fig5-figsupp2-data1.xlsx]

## Sheet: Fig.5-figure supplement 2A
Fig.5-figure supplement 2A
F-actin						CD44
siNT-vehicle	siNT-HHP	siAnk-vehicle	siAnk-HHP			siNT-vehicle	siNT-HHP	siAnk-vehicle	siAnk-HHP
30.8114	78.8889	45.2089	31.3788			35.028	77.473	48.407	30.7993
33.7855	73.633	33.1294	23.2602			32.4627	69.4854	33.9544	34.7101
47.1365	65.8403	32.3169	44.5421			39.9975	66.8263	36.8839	44.5411
35.7133	71.2673	26.0746	42.2624			39.1704	71.9072	34.4473	37.0819
37.6785	69.9968	38.8295	56.7071			39.1424	69.2606	39.5194	50.9509
36.6033	65.9811	36.4939	43.2011			31.8338	68.3366	32.5877	41.742
28.2061	50.7148	26.4181	32.6529			20.0266	53.3933	22.177	26.8895
31.4342	70.6918	25.8735	45.4974			40.1128	75.2219	29.1372	43.6319
34.9451	73.2249	23.9559	26.4257			34.7951	72.4948	23.2821	37.1121
44.6432	46.8898	27.0293	39.6277			43.5024	45.6658	36.3972	40.707
34.5538	56.7401	19.9168	25.7453			33.6701	55.6297	19.96	34.8857
26.9418	46.6151	33.5307	36.6452			22.7527	44.6016	26.1288	34.4861
44.1296	63.4879	24.6527	39.0338			36.0085	63.5943	25.1015	31.8518
24.8422	63.0341	26.062	30.967			19.6851	55.4201	25.6471	28.5676
25.245	64.1274	41.2044	42.2414			23.3619	64.5251	39.308	37.2173
26.5446	78.9461	21.8629	30.9382			22.3745	74.7745	24.4429	31.423
34.4966	41.0581	38.7218	37.3511			28.1688	33.0967	35.8069	35.1955
20.6452	64.7032	21.7861	75.0518			22.2097	69.6186	20.5631	67.0414
30.8575	56.0515	16.5691	47.7183			34.5509	55.9017	17.4509	39.308
	62.3863	19.8881	72.5538				59.7679	29.5165	64.8889
33.6621	50.1595	25.1857	30.5067			47.2286	51.3111	24.4125	26.62
34.7001	53.1153					45.6911	37.7169
28.7184	43.7194	43.4112	68.2212			29.0803	44.5548	39.0658	45.7625
42.2105	48.209	29.5752	35.397			39.6563	46.1642	32.7334	53.8709
44.4716	36.1157	31.9527	49.7454			39.014	44.7938	32.1355	43.3689
16.358	49.0628	29.1597	39.5628			15.2812	41.1195	26.9078	60.4337
39.4027	51.9287	36.7575	53.8051			39.3115	53.6425	37.0338	54.3243
26.4694	67.0649	41.488	46.6862			26.5012	59.9656	41.8233	40.483
45.1693	38.6184	31.9586	77.4894			44.8568	48.0725	34.6844	76.8791
61.0368	54.63	32.2442	69.5345			55.6536	53.6882	35.0759	63.9128
18.9568	41.3739	33.0905	53.3835			29.0321	52.1482	35.2908	58.3064
31.4194	53.4628	44.3258	41.6019			27.2435	49.6295	52.351	48.5631
38.7729	48.3784	18.913	40.0493			36.6345	58.611	28.3765	32.9111
30.0711	53.206	50.4966	58.1615			33.0228	50.2357	53.3006	51.159
29.0999	39.8277	28.4706	39.9079			36.8049	49.9361	32.41	43.3677
37.223	43.1527	33.4415	43.7523			44.955	48.2087	25.4034	47.8641
30.7397	48.7617	21.7181	38.5483			38.7948	43.7701	15.6394	39.3586
41.3408	40.6265	18.7597	42.4056			44.9822	43.1968	21.3354	42.1313
30.5386	33.1297	15.8746	46.1435			23.3569	34.7556	20.6262	51.3915
39.1209	44.3531	32.3199	52.8265			41.0329	46.1096	31.4651	49.808
9.6792	58.0127	34.7809	44.4332			5.4049	54.4644	43.3041	45.1837
26.8732	42.445	51.021	50.1148			33.6766	44.5343	48.8849	52.4518
29.9816	51.2358	27.9052	56.7597			37.6487	54.9088	27.9394	59.9251
27.1553	40.6439	32.2216	36.0391			29.9186	33.343	30.9021	42.3197
33.6561	53.4692	36.9935	44.8055			40.486	59.061	35.5264	45.4385
19.8128	37.4841	34.9773	41.3193			21.476	41.3329	32.0122	42.6778
30.8217	55.9709	36.6717	31.998			27.5677	54.8419	37.4542	31.2017
19.0615	72.1066	25.2179	37.0604			22.4152	69.594	25.8482	39.9235
16.6686	66.2321	28.6752	34.8525			21.8368	65.3867	35.2875	36.8469
18.2045	43.5453	23.3161	45.9559			16.4663	53.097	27.2891	42.0235
49.6739	38.5444	24.2942	61.0515			46.2766	39.5489	27.5955	58.5945
30.7785	47.3202	25.584	39.4744			30.8915	50.0996	20.4153	38.1759
31.6838	35.465	33.4125	44.9515			35.7602	38.1895	34.355	47.5633
28.0674	41.9597	17.1956	9.04245			34.9399	41.3043	19.2063	9.87357
33.0179	31.2047	22.6922	41.1844			33.6762	36.3462	18.9726	38.6037
32.5362	64.4814	28.7002	54.3634			35.4937	35.5038	25.9127	59.4972
13.0903	77.4582	20.833	39.1696			30.2277	72.1847	22.3726	29.6515
11.7478	34.9214	33.266	44.8536			14.9683	37.7586	32.5861	48.4627
29.401	43.3582	22.5709	34.7012			36.1871	42.7272	22.438	34.5305
19.0361	30.8862	31.5547	33.1747			17.191	39.663	35.808	36.8764
21.4717	37.5248		21.7826			25.6519	44.0958		23.9331
31.2971	49.5518		49.9856			33.9269	53.0577		44.3903
34.3984	53.193		32.308			39.84	54.3759		31.8056
21.7742	70.816		32.5795			24.6329	68.03		33.4225
32.3923	50.4978		26.1672			35.4096	55.5375		29.1508
19.8368	45.3048		46.5601			21.6846	44.1313		42.5083
32.3403	39.5194		30.4255			32.8807	39.6676		25.703
22.6255	52.0221		29.2976			25.2316	48.5574		35.328
41.4667	40.6905		26.4084			44.9914	42.6438		27.8465
19.5785	55.5434		43.639			21.5401	58.9807		50.2286
24.9131	45.2405		37.382			27.1249	52.5479		36.6727
29.3613	58.6639		31.6656			26.7055	60.8155		35.7458
20.0447	34.2585		43.8163			24.1302	40.4622		48.7121
32.9781	24.5738		31.5677			32.2118	25.9701		26.3687
26.7006	60.4873		24.4445			27.3816	59.7318		24.2323
26.3607	33.7338		24.0899			26.5436	38.7102		33.6393
23.1031	31.9288		40.4398			23.1635	36.0625		36.7223
37.3776	33.4259		22.9818			40.482	39.7394		23.881
31.5164	50.5651		23.1698			29.815	48.1257		35.0678
31.5481	51.723		38.5874			31.2077	56.157		38.0367
28.8839	35.5845		45.5282			34.0461	48.7542		43.6266
17.6982	30.9298		28.8206			22.4656	35.927		34.0559
37.3987	26.166		30.8461			33.0665	21.1673		28.8796
42.2504	46.4872		11.9888			35.5141	54.9154		13.4879
	60.2092		30.0622				70.4114		31.7725
	49.3074		31.0567				52.9278		31.2303
	53.5789						59.0326
	48.2168						48.9227
	51.9045						53.8951
	48.7182						52.642
	50.5179						57.4093
	45.9697						55.6055
	70.4811						69.3758
	36.7634						35.0006
	49.4771						47.62
	35.9925						41.0057
	48.6209						49.5026
	25.8701						32.1186
	52.1651						55.2244
	39.6988						47.6376
	36.1837						39.616
	39.366						32.4179
	39.6136						45.7489
	20.156						29.059
	21.9868						25.6964
	46.8453						71.7332
	31.5438						31.8908
	56.1919						58.8886
	38.8554						40.8745
	38.2968						39.7809
	23.8268						25.371
	52.0616						53.7039
	30.7347						39.1908
	46.2294						48.9729

## Sheet: Fig.5-figure supplement 2B
Fig.5-figure supplement 2B
F-actin						CD44
siNT-vehicle	siNT-HHP	siERM-vehicle	siERM-HHP			siNT-vehicle	siNT-HHP	siERM-vehicle	siERM-HHP
30.8114	78.8889	40.9174	40.2518			35.028	77.473	34.9892	30.6847
33.7855	73.633	39.77	58.4501			32.4627	69.4854	36.6741	61.431
47.1365	65.8403	28.6027	37.225			39.9975	66.8263	38.4864	33.7292
35.7133	71.2673	44.8728	46.6234			39.1704	71.9072	46.6204	40.9633
37.6785	69.9968	38.7491	39.1382			39.1424	69.2606	42.9564	37.3939
36.6033	65.9811	42.1204	56.6892			31.8338	68.3366	38.9454	63.1827
28.2061	50.7148	39.5191	58.9697			20.0266	53.3933	34.8995	56.4542
31.4342	70.6918	38.7892	58.3552			40.1128	75.2219	37.8852	55.9737
34.9451	73.2249	26.5789	51.9566			34.7951	72.4948	25.9215	39.2328
44.6432	46.8898	25.0237	31.953			43.5024	45.6658	22.8239	37.9215
34.5538	56.7401	69.8498	63.6616			33.6701	55.6297	72.7551	48.9426
26.9418	46.6151	41.7288	42.7921			22.7527	44.6016	42.7671	45.3872
44.1296	63.4879	21.1148	61.017			36.0085	63.5943	24.0959	59.4196
24.8422	63.0341	19.1862	52.247			19.6851	55.4201	17.1324	34.4488
25.245	64.1274	28.8178	56.8779			23.3619	64.5251	27.9179	47.8428
26.5446	78.9461	36.4515	36.6507			22.3745	74.7745	28.1294	39.633
34.4966	41.0581	27.6676	47.9194			28.1688	33.0967	27.8759	51.985
20.6452	64.7032	22.9483	31.2265			22.2097	69.6186	21.2904	29.2562
30.8575	56.0515	31.3764	53.5202			34.5509	55.9017	31.172	55.9877
	62.3863	26.1653	66.5873				59.7679	29.5224	61.3677
33.6621	50.1595	24.3926	34.6221			47.2286	51.3111	23.5107	35.1987
34.7001	53.1153	16.8608	41.3419			45.6911	37.7169	20.22	33.0069
28.7184	43.7194	38.2572	44.199			29.0803	44.5548	41.9909	36.9347
42.2105	48.209	24.7426	50.8657			39.6563	46.1642	24.2007	53.1352
44.4716	36.1157	13.7732	38.8588			39.014	44.7938	13.5103	81.5266
16.358	49.0628	36.488				15.2812	41.1195	32.6845
39.4027	51.9287	23.7643	48.5			39.3115	53.6425	24.1273	37.0907
26.4694	67.0649	35.6225	46.3514			26.5012	59.9656	30.6986	41.409
45.1693	38.6184	34.9421	45.5271			44.8568	48.0725	16.0901	44.1051
61.0368	54.63	27.5106	47.6959			55.6536	53.6882	36.0833	46.516
18.9568	41.3739		62.6397			29.0321	52.1482		60.8787
31.4194	53.4628	59.1603	60.357			27.2435	49.6295	54.5397	60.5179
38.7729	48.3784	60.5964	49.3132			36.6345	58.611	43.6995	42.6482
30.0711	53.206	52.9033	41.6186			33.0228	50.2357	47.7115	41.9194
29.0999	39.8277	39.1614	52.4505			36.8049	49.9361	38.1105	46.1316
37.223	43.1527	30.362	51.4379			44.955	48.2087	24.7041	38.2216
30.7397	48.7617	38.6271	68.3379			38.7948	43.7701	33.6773	64.6377
41.3408	40.6265	53.7407	38.5773			44.9822	43.1968	53.1535	23.2127
30.5386	33.1297	19.793	38.2443			23.3569	34.7556	35.8177	39.1732
39.1209	44.3531	34.2657	58.9913			41.0329	46.1096	34.3861	62.5675
9.6792	58.0127	45.3318	23.2678			5.4049	54.4644	41.9581	21.7684
26.8732	42.445	35.4493	39.0109			33.6766	44.5343	37.5659	44.7984
29.9816	51.2358	37.5244	54.8559			37.6487	54.9088	46.2029	56.8319
27.1553	40.6439	36.402	39.7268			29.9186	33.343	45.9294	27.7086
33.6561	53.4692	37.8238	56.3869			40.486	59.061	43.4118	61.5984
19.8128	37.4841	45.5018	38.5312			21.476	41.3329	44.9324	39.525
30.8217	55.9709	44.6729	55.451			27.5677	54.8419	39.7539	46.2791
19.0615	72.1066	39.8045	49.4644			22.4152	69.594	47.2092	57.3989
16.6686	66.2321	35.8003	38.7656			21.8368	65.3867	32.6091	36.4477
18.2045	43.5453	30.3711	54.3901			16.4663	53.097	37.9719	57.3234
49.6739	38.5444	65.602	35.0645			46.2766	39.5489	59.0031	38.1289
30.7785	47.3202	45.4922	41.2808			30.8915	50.0996	45.4643	42.822
31.6838	35.465	43.6887	43.6078			35.7602	38.1895	43.951	44.8695
28.0674	41.9597	39.0184	26.0291			34.9399	41.3043	36.9711	36.7015
33.0179	31.2047	38.1413	43.8505			33.6762	36.3462	38.6286	40.6011
32.5362	64.4814	43.1006	30.4034			35.4937	35.5038	41.526	38.3254
13.0903	77.4582	31.3273	35.5117			30.2277	72.1847	30.9035	42.1916
11.7478	34.9214	34.3789	42.7225			14.9683	37.7586	27.6986	54.9316
29.401	43.3582	51.8979	30.9573			36.1871	42.7272	48.901	31.2881
19.0361	30.8862	25.7073	58.414			17.191	39.663	25.6434	58.7922
21.4717	37.5248	38.116	46.5056			25.6519	44.0958	41.6025	39.5858
31.2971	49.5518	31.5113	48.1881			33.9269	53.0577	32.4387	47.5182
34.3984	53.193	36.429	50.7338			39.84	54.3759	37.5279	51.6023
21.7742	70.816	33.2071	49.6601			24.6329	68.03	29.3357	46.7825
32.3923	50.4978	42.8838	45.1963			35.4096	55.5375	39.0215	46.2361
19.8368	45.3048	30.0892	48.182			21.6846	44.1313	35.645	43.3135
32.3403	39.5194	35.194	51.1484			32.8807	39.6676	40.5496	56.883
22.6255	52.0221	31.6203	34.5753			25.2316	48.5574	29.0203	32.4141
41.4667	40.6905	36.9993	40.4782			44.9914	42.6438	27.4206	45.1742
19.5785	55.5434	38.9224	47.2367			21.5401	58.9807	42.4011	45.5167
24.9131	45.2405	45.2422	26.6272			27.1249	52.5479	42.9579	27.177
29.3613	58.6639	40.9192	40.8542			26.7055	60.8155	38.0383	42.5354
20.0447	34.2585	28.2718	37.8802			24.1302	40.4622	27.4052	39.3539
32.9781	24.5738	27.0856	34.543			32.2118	25.9701	27.4669	37.0014
26.7006	60.4873	18.11	41.0981			27.3816	59.7318	18.3517	47.1366
26.3607	33.7338	34.9742	29.1971			26.5436	38.7102	30.8399	28.4913
23.1031	31.9288	41.4533	36.6993			23.1635	36.0625	51.1373	45.1619
37.3776	33.4259	21.3306	26.5451			40.482	39.7394	19.0352	27.5904
31.5164	50.5651	36.0209	39.1857			29.815	48.1257	37.5477	45.0088
31.5481	51.723	25.4203	31.5881			31.2077	56.157	30.8522	38.5019
28.8839	35.5845		31.5846			34.0461	48.7542		32.0046
17.6982	30.9298		45.9915			22.4656	35.927		38.7386
37.3987	26.166		35.8813			33.0665	21.1673		33.3445
42.2504	46.4872		42.5152			35.5141	54.9154		49.0769
	60.2092		33.2818				70.4114		28.9068
	49.3074		38.1115				52.9278		36.8515
	53.5789		51.7883				59.0326		53.5868
	48.2168		31.2001				48.9227		26.8071
	51.9045		31.1255				53.8951		31.3525
	48.7182		32.5734				52.642		29.666
	50.5179		53.615				57.4093		51.1571
	45.9697		41.6424				55.6055		42.0295
	70.4811		37.8111				69.3758		30.835
	36.7634						35.0006
	49.4771						47.62
	35.9925						41.0057
	48.6209						49.5026
	25.8701						32.1186
	52.1651						55.2244
	39.6988						47.6376
	36.1837						39.616
	39.366						32.4179
	39.6136						45.7489
	20.156						29.059
	21.9868						25.6964
	46.8453						71.7332
	31.5438						31.8908
	56.1919						58.8886
	38.8554						40.8745
	38.2968						39.7809
	23.8268						25.371
	52.0616						53.7039
	30.7347						39.1908
	46.2294						48.9729

## Sheet: Fig.5-figure supplement 2C
Fig.5-figure supplement 2C
siNT	siAnk2	siAnk3	siEzr	siMsn	siRdx
100	8.8	29.6	23.1	9.1	20.4
100	14.8	33.1	28.2	9.7	40.3
