# Supplementary material for: Human birth tissue products as a non-opioid medicine to inhibit post-surgical pain
Source: eLife. 2024 Dec 13;13:RP101269. doi: 10.7554/eLife.101269 (PMC11643635; doi:10.7554/eLife.101269)
Supplement: Figure 5—figure supplement 3—source data 1. [file elife-101269-fig5-figsupp3-data1.xlsx]

## Sheet: Fig.5-figure supplement 3C
Fig.5-figure supplement 3C
Fig.1A
Veh	Lat-A
62.4499	61.0579
68.739	31.8087
46.7855	53.804
75.5631	35.4397
34.1404	13.4469
96.7535	49.8119
68.837	50.9887
	32.0003
