# Supplementary material for: Human birth tissue products as a non-opioid medicine to inhibit post-surgical pain
Source: eLife. 2024 Dec 13;13:RP101269. doi: 10.7554/eLife.101269 (PMC11643635; doi:10.7554/eLife.101269)
Supplement: Figure 5—source data 1. [file elife-101269-fig5-data1.xlsx]

## Sheet: Fig.5B
Fig.5B
	F-Actin																																											CD44
Control	39.9648	0	69.2048	35.9243	0	0	35.3588	73.7658	46.8032	0	88.6401	11.158	18.3577	70.5892	78.7261	0	32.219	41.9379	46.3384	46.3925	69.061	35.1221	0	25.3216	0	38.5377	8.99138	43.073	43.073	25.7339	29.6716	0	55.1861	36.5818	29.0679									24.5653	41.7542	51.0164	41.2037	26.9979	0
15ug HHP	59.5574	46.7317	37.8424	39.8019	77.7517	66.1211	65.6632	71.16	72.3869	85.6516	81.515	83.8228	67.0397	60.5997	69.7562	61.5887	72.1268	64.115	42.9165	56.5757	57.6548	56.6882	67.0397	60.5997	69.7562	61.5887	72.1268	64.115	42.9165	56.5757	57.6548	56.6882	74.245	74.8729	55.172	67.4664	51.3246	67.799	62.7443	63.4762				0	26.0238	54.4609	58.1187	57.8691	67.9805
10ug HHP	68.6616	29.1014	56.1686	47.8735	22.426	41.6854	27.3986	57.354	44.6301	72.9923	68.0211	84.8901	84.3154	25.8739	72.4945	62.9897	48.1322	80.7486	30.2125	63.9364																								65.6044	32.1154	63.4321	19.3144	41.6414	41.4994
10ug HHP + LAT	46.6877	32.5004	30.4188	31.3694	18.7986	20.3259	9.77975	17.3273	79.015	38.1045	36.3037	33.9158	61.5317	35.4405	51.1774	40.1888	25.8211	21.3285	54.3991	25.0933																								26.4684	36.7079	41.4945	18.786	27.8191	6.0686
15ug HWHA	19.2521	36.1862	70.1299	33.6284	32.1671	35.042	0	58.4298	40.8935	44.9219	56.2975	40.9079	57.8682	52.1699	47.751	0	36.8235	48.2297	59.5644	62.4681	26.3807	67.7222	60.085	44.2859	64.7238	80.6679	79.0203	0	23.5643	28.6457														51.9226	59.9884	31.7713	22.7414	67.3218	0
[truncated: 32 more columns]

## Sheet: Fig.5C
Fig.5C
Ratio	0	0.5	1	2	5	10	15														0.5																				1
																					115.591	120.35	120.103	124.147	113.643	62.3325	122.3	108.149	110.429	93.3434	110.698	46.6801									115.419	113.643	102.794	114.358	116.43	65.8338	148.038	112.156	96.2441
	98.0356	115.591	115.419	94.1645	87.2605	89.4057	95.1754
	119.043	120.35	113.643	114.901	108.835	93.2028	99.9342
	107.824	120.103	102.794	106.296	89.1345	87.6058	88.2715
	90.0714	124.147	114.358	125.257	88.6413	99.8849	96.11
	85.2634	113.643	116.43	98.8246	88.666	79.9799	92.2368
	99.7616	62.3325	65.8338	97.5918	94.7015	102.85	76.3749
	110.429	122.3	148.038	107.193	85.5634	86.9215	86.5359
	119.668	108.149	112.156	113.548	89.6378	78.2193
	124.614	110.429	96.2441	94.9195	91.9852	98.2562
	83.501	93.3434	96.3615	100.604	96.7807	96.7639
	66.6499	110.698	110.496	100.101
	95.1375	46.6801	42.3877	63.7156
[truncated: 42 more columns]

## Sheet: Fig.5D
Fig. 5D
F-actin						CD44
siNT-vehicle	siPFN1-vehicle	siNT-HHP	siPFN1-HHP			siNT-vehicle	siPFN1-vehicle	siNT-HHP	siPFN1-HHP
26.3298	20.0063	24.3659	19.0888			41.7689	28.4122	27.9616	23.6112
36.0139	29.78	40.1974	20.6117			34.0399	35.5774	52.4136	26.6066
	27.1747	49.8143	34.1202				30.6283	58.3779	28.4417
29.2526	35.1454		22.9377			30.6692	43.5168		31.3094
30.1994	33.9763	51.0997	22.7734			29.6913	35.1366	60.0632	25.3015
22.2817	35.9549	65.3892	19.4637			28.6849	39.7388	68.7488	13.6867
21.6209	14.9774	41.397	14.4739			32.3674	16.7382	51.6309	29.9358
31.4415	27.7647	36.0222				23.1252	30.426	46.7941
19.4444		49.9558	18.7188			23.8749		64.2167	25.9141
20.9853		59.7392	20.6573			26.4511		72.6063	23.3168
32.8647	28.7648	25.3078	16.5481			41.6214	37.0747	23.2854	24.38
26.4847	27.3768	55.3379				36.186	29.2145	43.1538
		41.8119	34.6776					51.0938	37.5144
19.2743			22.4036			30.1092			27.2915
20.8055	30.682	46.0754	23.5803			32.7693	37.5616	61.3826	28.2836
18.4441	41.1441	60.8589				20.3069	44.853	70.4046
27.3848	30.9448	55.9148	39.8126			25.9743	35.7838	65.4185	40.2114
	29.9582	57.866	33.9427				42.9081	67.4818	38.6544
21.9804		49.2889	36.6764			17.0884		53.8664	30.9587
11.4067	19.2029	75.0648	25.4774			19.5921	28.8662	74.267	33.1871
19.734	28.0355	42.718	40.0911			23.6652	42.2504	55.0667	41.4597
	19.0955	36.6627					23.9872	49.5264
25.9494	21.839		14.0014			24.3126	27.2094		15.7263
16.3576	13.0946	40.6382				29.0816	15.924	56.7286
35.7325	24.0232	31.6848	19.1638			40.6824	31.6894	49.4759	34.9064
30.4236		47.7189	18.2589			40.4702		56.1368	19.0258
	22.9106	53.5141					25.8466	55.0865
21.6079	10.8922	69.9552	23.9101			24.1535	15.1113	69.1694	31.0825
27.0455	29.7424	43.4473	19.1798			26.6019	36.6519	46.9143	38.4026
	26.6013	74.0408	37.7643				24.4538	76.6327	40.2297
23.668		48.2195	38.9613			31.0413		43.8544	45.49
35.531	27.0734	37.2758	38.0811			39.3479	39.4595	34.9453	34.7348
20.2126	21.4008					23.9436	35.271
21.1681	21.5672	35.2699	30.4381			28.17	33.8755	57.1652	36.3227
	19.6287	50.2264	27.3785				39.4357	62.2942	31.1169
17.6967	38.5866	58.4425				25.8425	46.0178	66.8923
14.0164			20.9385			17.1896			31.1733
33.1523	30.1166	45.179	29.7258			39.7665	41.0543	51.1414	44.8613
29.6882	34.0169	28.9656				27.0504	35.5469	35.3668
	28.7698	21.216					31.0472	39.7158
22.5131	19.992	31.4897				27.1765	22.6958	27.5367
16.377		23.7571	31.3262			20.4902		17.1442	35.2382
30.8269	20.2364	25.7441	45.5918			38.0421	25.6132	33.3878	44.4312
21.6325	23.9744	50.7259				26.0138	27.3696	57.2486
24.6508			30.6894			25.1391			31.5562
	36.7478	56.4914	38.0554				36.8386	67.4594	45.1974
	31.468	35.6913	19.7637				31.0843	46.4089	21.7433
	33.4404	50.1715					43.0864	46.6775
47.3883	26.421	37.5913	28.2444			25.5765	38.207	63.4109	37.4397
47.5147		54.5988	23.9664			29.0396		43.8713	22.1296
29.817	31.8726		30.3913			31.6602	35.729		18.2848
	22.3922	58.9081					24.3196	65.4156
35.4692	33.3154	45.2969	33.9794			35.3589	30.2727	59.5866	29.4921
24.0279		32.9419	20.7429			29.1544		38.9202	19.6875
		28.5225	14.1771					31.2442	18.3954
28.143						33.5467
23.6569	28.808	43.6162	25.6902			22.9789	17.1956	51.5836	25.9986
	20.9002	39.8978	26.973				31.959	60.3867	27.1069
36.3864	35.538	73.3944				36.5012	37.578	81
	36.6715		31.4083				40.1967		20.0226
37.2556			22.794			35.5759			23.532
26.0055	22.1398					19.8366	22.6311
	16.0215	59.6639	25.641				16.2506	62.5179	25.2669
20.6708	19.1357	57.5498	24.2496			20.1229	20.2031	56.8094	27.3542
32.0664	19.383	55.9927	28.2634			26.0145	19.1587	56.465	28.8277
18.6643	21.1864					28.4412	20.2235
	19.5108	71.8526					20.0659	67.1525
30.8278		66.2592				25.8314		59.8168
	38.2884		31.6616				28.7483		26.3773
22.844	23.8045	48.998	47.2733			31.7515	27.7554	48.7984	45.4687
			19.0932						20.5289
27.015	27.5779	39.9985	27.4961			25.6677	17.0658	22.8651	29.8416
	14.3009		16.2424				20.8605		23.4809
		38.8369						44.1655
	21.6217	51.7361	38.3479				25.235	50.3212	40.1426
19.8343			29.7362			24.8048			33.1259
	24.1988	39.1854	27.9791				31.3047	63.3367	25.7556
28.3835		29.0227				31.9087		15.7631
45.7682	27.8567		18.0553			34.3808	32.2298		21.5795
33.8016		50.1468				21.7379		51.4116
	16.3748	47.9267	34.5908				23.4157	48.18	29.4332
29.8136	22.5702	61.5182	24.6919			21.7625	26.8844	52.9769	21.8059
35.8573	33.7857	63.262				33.6621	32.3719	62.1043
18.4431	22.7645		23.1199			12.5076	18.7799		25.3412
25.4724		59.4961	17.3303			24.6483		57.5505	20.1931
	12.4718						16.0106
30.9567		78.1762	33.8376			17.6537		61.1049	30.4401
25.2936	18.4061	77.4079	26.0252			22.294	20.2192	61.6256	23.758
27.3855	14.1484	34.9654				30.9733	14.5379	32.2017
		36.5756	26.5736					35.3078	17.225
12.393			23.5641			12.2247			21.5129
28.5666		34.4562	29.0537			28.6614		40.8798	31.838
	25.3291		34.2905				27.7665		27.5679
22.8715	14.1897	57.4783				20.4118	21.044	41.1351
19.1137	36.7363		40.2321			23.7535	36.6934		41.3422
16.9542		37.4787	19.5672			16.9925		35.2518	14.3813
	25.4994	58.4244	23.7919				29.1449	67.8657	21.2093
28.6891	22.9481					29.7761	24.5325
43.9555	18.4901					36.5836	23.6148
36.1407	37.1924	36.0278				31.6289	41.809	40.2285
37.8026	33.5269	37.9788				35.7166	46.7937	43.2167
40.2109						26.2522
	22.5781	35.6825					20.8622	41.2858
20.9133		43.9634				20.445		43.7433
	14.7304	38.4843					16.0283	45.7083
	24.7815	49.4698					29.4083	59.089
	21.2092	34.632					18.8581	20.4608
	20.1175	40.9055					20.3848	33.1418
	29.0711	63.9625					22.3578	58.9327
		58.5267						62.7669
	25.1683	53.8988					26.3941	52.6637
	38.2039						39.0675
		42.8492						25.0207
	32.9375	37.649					34.6027	36.3343
	40.2673	56.5969					40.0734	50.158
	38.1438	50.3949					41.4595	50.4919
	10.8839	43.9417					20.8278	48.5508
	26.8901	41.032					33.191	36.8451
	20.3183						22.7446
	42.3445	52.8479					37.1588	61.7925
		56.3043						67.6535
		62.7792						59.4445
		62.9234						57.5863
		57.3832						49.2806
		65.4702						56.2532
		42.1755						39.3817
		38.7771						36.1729
		57.8334						61.4888
		36.0158						54.3345
		47.6022						27.4423
		37.4004						38.159
		42.5906						44.093
		36.3552						41.0571
		31.6333						42.2688
		52.9495						44.483
		44.9994						53.9804
		58.4273						60.9006
		57.9672						57.8387

## Sheet: Fig.5G
Fig.5G
b
	Vm	Pre-Drug+ Veh Infusion								10 μg/ml HC-HA/PTX3+Vehicle Infusion
-80		-0.367348	0.89727	-2.00775	0.122945	-1.22827	0.658529	-0.943976		-0.52282	0.145618	-0.862282	-0.343571	-1.30745	-0.0318547	-1.35573
		-0.721462	0.443598	-0.869687	-1.08845	-0.568713	0.051459	-1.39273		-0.837732	0.0713921	-0.495019	-0.669356	-2.6685	-0.122122	-1.07636
-60		-0.929585	-0.26504	-0.641075	-1.0586	-1.37422	-0.159236	-1.05452		-0.65099	0.0490493	-0.919121	-0.560157	-1.41973	-0.207219	-1.25905
		-1.58279	-0.521256	-0.340028	-0.583187	-2.02414	-0.298664	-1.38679		-1.94721	-0.122379	-0.657235	-0.698917	-2.39707	-0.531955	-0.992671
-40		-1.11286	-1.94764	-0.392102	-2.41086	-1.89856	-0.918234	-4.45382		-3.13318	-0.644539	-0.627473	-1.06262	-2.35337	-0.894477	-1.60493
		-3.96064	-7.42889	-7.87211	-7.1698	-3.03636	-6.15888	-16.8991		-6.06542	-3.6795	-5.61518	-1.34277	-2.9151	-11.2869	-4.44703
-20		-9.09137	-30.8047	-13.7615	-12.7271	-12.6552	-27.5695	-38.9382		-14.0756	-13.7036	-9.78544	-3.40767	-13.0973	-52.1723	-10.0692
		-122.347	-63.5846	-20.9202	-18.4936	-28.5294	-79.825	-54.9649		-40.5473	-20.1065	-17.6177	-8.7917	-20.5057	-59.2256	-14.1553
0		-126.019	-48.1858	-24.9799	-14.7801	-23.6852	-92.7123	-47.224		-35.6752	-17.12	-16.1495	-14.9844	-15.699	-44.6635	-13.3062
		-107.378	-31.4154	-21.0592	-16.0591	-11.3273	-62.7254	-38.3188		-28.101	-11.8184	-9.76679	-12.8337	-12.421	-28.2497	-11.0605
20		-85.9713	-22.7147	-8.44931	-9.1256	-3.14484	-33.3435	-26.8952		-22.0937	-7.41214	-5.71041	-2.79433	-7.45538	-12.9685	-7.12376
		-67.9342	-17.5334	1.89842	-9.82035	3.30158	-8.00645	-17.575		-18.4705	-6.31734	-5.44517	1.34384	-3.25257	-4.32229	-4.15324
40		-41.4153	-15.1275	3.48858	-11.6278	6.7608	-5.23699	-9.40535		-15.3045	-5.16313	-13.6515	3.2789	0.221948	-2.72308	-1.93622
		-31.0031	-13.0664	6.40852	-13.5034	12.988	-3.94123	-4.09995		-10.5004	-4.08113	-2.20216	2.80502	1.71816	-3.60356	-0.666743
60		-16.8386	-13.176	8.69807	-14.1924	17.2496	-1.29644	0.641703		-9.52454	-3.45976	-0.951382	5.31118	4.33929	-1.50621	3.21011
c
	Vm	Pre-Drug+Veh. Infusion								10 μg/ml HC-HA/PTX3+Veh. Infusion
-80	-80	0.0215265	-0.00304411	0.00856686	0.00122182	-0.00705572	0.0340494	-0.00273422		0.0318801	0.000268927	0.0436657	0.00628071	-0.00362115	0.022883	0.00956104
	-70	0.0107339	-0.000256172	0.0136117	0.0025842	-0.00375657	0.0158836	0.0260684		0.0700724	0.0011103	0.0373344	0.0108379	-0.00191191	0.0141472	0.02006
-60	-60	0.0280983	0.000858762	0.0111651	0.00360715	0.00243151	0.012684	0.0274663		0.0403876	0.00204097	0.0473104	0.00912384	-0.00142303	0.0284566	0.0181864
	-50	0.0451496	0.00175713	0.016018	0.00670018	0.00521681	0.00733925	0.0165068		0.0743893	0.00571572	0.0406919	0.0297718	0.00387325	0.0221983	0.0247543
-40	-40	0.0465834	0.00594247	0.0565876	0.00518198	0.0214414	0.00930953	0.075062		0.0803366	0.010572	0.0723687	0.052695	0.0224393	0.0233124	0.0413994
	-30	0.0827783	0.0442867	0.238567	0.0204917	0.0908714	0.207672	0.248035		0.110569	0.148225	0.222804	0.113345	0.142334	0.2318	0.0581266
-20	-20	0.388138	0.223024	0.618408	0.0529171	0.423909	0.408418	0.495323		0.558876	0.770795	0.567543	0.295911	0.596355	0.454446	0.165953
	-10	1	0.737997	0.997646	0.813865	1	0.709571	0.822568		1	1	0.911837	0.974201	1	0.93507	0.489319
0	0	0.968571	1	1	0.978001	0.884127	0.988481	0.766966		0.893189	0.879813	1	1	0.993378	1	0.972985
	10	0.555853	0.811871	0.973713	1	0.691701	1	1		0.848026	0.667779	0.997469	0.945229	0.822904	0.725728	1
d
	Vm	Pre-Drug + Lat-A Infusion											10 μg/ml HC-HA/PTX3 + Lat-A Infusion
-80		-0.664238	-0.246583	-1.52521	-0.316517	-0.489575	1.19638	3.1466	-1.49145	-1.36036			-0.974631	0.316111	-0.264708	-0.449954	-0.28489	-0.00663041	-0.925178	-1.36084	-0.886321
		-0.781552	-1.16043	-1.82664	-0.400227	-0.62337	0.0420467	1.33291	0.0946658	-0.233943			0.186238	-2.6087	1.01816	-0.482505	-0.0911694	-0.374488	-0.661639	0.0157553	-1.91789
-60		-0.515348	-0.920832	-1.74695	-0.406644	-0.561088	0.135373	-0.12723	-1.23963	-1.31682			-0.907065	-1.46465	-0.751945	-0.0850457	-0.227981	-0.588379	-0.562369	-3.73307	-1.23018
		-0.558238	-0.869182	-1.44925	-0.284971	-0.0850361	-0.303432	-0.651817	-1.00522	-0.855625			-1.43899	-3.39635	0.180866	-0.580456	-0.68536	-0.6707	-0.249585	-1.67284	-1.76307
-40		-0.810839	-0.983427	-4.68139	-0.724332	-0.444927	-0.895079	-1.52135	-1.40182	-1.31495			-1.54437	-3.96848	-3.17909	-0.824087	-1.0427	-1.58636	-2.3735	-2.85127	-3.89646
		-2.02175	-13.8808	-7.01502	-1.57563	-1.13141	-1.93406	-11.6489	-10.289	-2.696			-4.84554	-45.6813	-10.2977	-3.67433	-3.66521	-5.77333	-5.22083	-17.4316	-5.5141
-20		-9.54342	-61.8689	-15.9028	-19.4399	-3.1214	-11.2983	-14.3293	-17.2919	-7.02415			-17.9892	-78.0291	-16.7278	-29.5722	-9.41346	-24.404	-17.405	-31.4943	-13.8071
		-20.1807	-82.7737	-29.6429	-51.7619	-8.46408	-26.7304	-18.247	-33.8137	-12.6297			-20.4629	-85.5713	-27.6077	-91.5316	-24.0668	-38.1863	-26.981	-65.3032	-22.7452
0		-17.8526	-77.7035	-35.7976	-84.6497	-12.9418	-30.098	-21.715	-49.3019	-12.2723			-16.7501	-82.0454	-27.0629	-135.868	-31.6831	-33.4778	-25.4236	-95.3765	-23.8836
		-9.8844	-58.5903	-30.4454	-84.6481	-11.4802	-19.7677	-15.4549	-49.0222	-11.647			-11.3333	-43.8978	-26.3056	-129.626	-24.8177	-21.256	-15.8952	-81.145	-32.4356
20		-2.77023	-34.1253	-20.4732	-67.1141	-6.4985	-5.83321	-8.5968	-33.7792	-8.40039			-3.74872	-53.9141	-22.8106	-95.3017	-14.8109	-11.5124	-7.09215	-52.8698	-11.7158
		-0.825029	-7.84368	-7.3839	-39.4476	-1.01261	-5.37369	-8.54501	-14.0652	-3.11344			-6.98098	-48.5359	-17.105	-53.1737	-3.61384	-3.51768	-1.88703	-23.3911	-8.20723
40		0.832701	0.504425	-14.1231	-6.60518	0.130172	-7.33785	-2.14707	-1.94901	-0.910343			-4.17656	-3.70512	-9.39156	-19.4673	0.371699	4.1198	2.51797	-9.2984	-5.08046
		1.98962	3.17097	-11.9781	-2.97524	1.48408	-5.57778	-5.48726	5.50856	-0.621384			-2.55664	-3.09243	-6.06891	-7.92654	0.731074	-3.44306	6.8379	1.70705	-8.03427
60		2.37707	4.73082	-7.80031	-1.49634	3.35484	-5.80105	-5.90942	11.1615	-1.44143			-3.51048	-47.9833	-8.64352	-1.44733	2.51938	-5.67405	12.2497	12.65	-8.65078
e
	Vm	Pre-Drug+LAT-A Infusion											10 μg/ml HC-HA/PTX3+LAT-A Infusion
-80	-80	0.0159458	0.00136002	0.0178916	0.00133543	0.0152304	-0.0170356	-0.0621019	0.0108657	0.041714			0.0238146	-0.00165124	0.00359386	0.00123971	0.00385365	8.48801e-05	0.0155959	0.00598947	0.00975913
	-70	0.0202053	0.00689267	0.0230759	0.00181851	0.0208844	-0.000644766	-0.0283301	-0.000742723	0.00772539			-0.00490068	0.014675	-0.0148866	0.00143165	0.0013281	0.00516284	0.0120113	-7.46777e-05	0.0227419
-60	-60	0.0144335	0.00592529	0.0239083	0.00200164	0.0203643	-0.00224888	0.00292955	0.0105363	0.0471086			0.0258576	0.00892585	0.0119104	0.000273369	0.00359783	0.0087876	0.01106	0.0191687	0.0158028
	-50	0.017056	0.00610139	0.021637	0.00153025	0.0033669	0.00549898	0.0163729	0.00932063	0.0333922			0.0447503	0.0225796	-0.00312525	0.00203543	0.0117991	0.0109277	0.00535476	0.00937062	0.0247072
-40	-40	0.0272512	0.0075937	0.0768817	0.00427849	0.019378	0.0178433	0.042036	0.0142978	0.0564499			0.0528304	0.0290216	0.060426	0.00317872	0.0197461	0.0284313	0.0560148	0.017569	0.0600645
	-30	0.075498	0.119092	0.128007	0.010341	0.0547517	0.0428392	0.35763	0.116602	0.128597			0.184175	0.371188	0.217481	0.0157476	0.0771223	0.114968	0.136902	0.119345	0.0944452
-20	-20	0.400926	0.597163	0.326461	0.143535	0.169933	0.281537	0.494911	0.220461	0.376928			0.769226	0.713286	0.39744	0.142585	0.222835	0.54672	0.513449	0.242577	0.266049
	-10	0.968923	0.913073	0.695458	0.436783	0.526625	0.761239	0.720254	0.492688	0.774549			1	0.893978	0.749641	0.504373	0.651094	0.977696	0.909647	0.574837	0.500887
0	0	1	1	0.979829	0.83335	0.93943	1	1	0.838088	0.87807			0.954988	1	0.857323	0.873465	1	1	1	0.979486	0.613615
	10	0.664402	0.904829	1	1	1	0.788133	0.854058	1	1			0.775389	0.642051	1	1	0.939974	0.761913	0.750257	1	1

## Sheet: Fig.5H
Fig.5H
b
Vm	Pre-Drug															HHP
-60	-0.338266	-1.22763	-0.129358	-0.568527	-0.403625	0.285491	-1.11775									-0.318903	-0.736544	0.0126848	-0.616644	-1.15671	-0.219559	-0.0389654
-50	-4.81408	-4.8602	-0.924839	-2.42018	-0.833222	0.0456062	-5.08613									-1.90218	-1.69934	-0.633083	-1.1248	-0.986116	-0.442872	-1.94487
-40	-23.317	-12.3192	-4.27173	-10.3942	-2.47797	-0.460568	-18.6759									-7.56541	-3.69501	-2.66031	-2.57392	-3.15937	-0.577626	-8.29107
-30	-30.4991	-17.6302	-10.0366	-20.5274	-4.36496	-3.96606	-50.1701									-11.4524	-5.51139	-5.88438	-4.53896	-1.5495	-0.641003	-18.5727
-20	-23.1979	-14.9047	-14.2877	-19.9348	-4.79713	-19.9634	-62.6244									-8.86531	-5.44369	-7.60312	-5.01626	-1.24996	-0.824215	-19.5156
-10	-14.3944	-9.60916	-12.8771	-13.7753	-3.49074	-42.4199	-47.2703									-5.13283	-3.62203	-7.09919	-3.44355	-2.13053	-1.30061	-14.2589
0	-7.18366	-4.58586	-8.6333	-7.34426	-1.65389	-39.6997	-27.942									-1.98279	-1.66539	-4.55593	-1.6508	-1.6114	-1.37714	-7.69462
10	-2.25216	-1.16837	-4.73378	-2.77573	-0.495072	-27.379	-13.4419									-0.229542	-0.759627	-2.53352	-0.494616	0.035086	-0.78374	-2.81962
20	0.998344	0.833956	-1.75165	0.253749	0.402451	-16.9533	-3.6796									1.42804	0.493887	-0.74352	0.855769	0.729726	-0.49195	1.03346
30	4.03944	2.15548	-0.0247452	2.1273	1.47257	-9.31638	3.23122									1.35793	0.902394	0.120756	1.52926	2.04274	-0.0650703	2.39184
40	5.63396	3.1966	1.41729	3.75278	2.2363	-4.33784	7.17601									2.51854	1.16102	1.18577	2.13221	1.5116	0.27696	4.39307
50	6.82225	4.74623	2.29235	4.66878	3.04917	-1.35486	10.6507									2.26123	2.13135	1.9366	3.00677	3.13923	0.772048	6.55667
60	8.52285	6.01988	2.99851	5.933	4.01712	0.26401	14.8079									2.56026	3.17952	2.52152	3.67736	3.20409	1.01961	8.49292
70	16.2003	9.63658	6.15827	9.55952	9.8331	4.0459	27.6932									6.22327	5.98973	5.07792	5.81619	9.45174	3.51725	16.0145
c
Vm	Pre-Drug												HC-HA/PTX3
-60	0.00428751	0.000950313	0.011547	0.00179604	0.0136353	0.00193793	0.00155332						0.0119988	0.0176763	0.00580461	0.0137077	0.0490977	0.0102066	0.0067662
-50	0.00575033	-0.00403158	0.000592729	0.0545656	0.0833494	0.0194559	-0.00212011						0.0209435	0.0674214	0.0057798	0.153113	0.117578	0.0668083	-0.0157965
-40	0.13161	0.0523639	-0.0320838	0.152789	0.240083	0.0678485	0.013466						0.0574546	0.0228472	-0.00386765	0.371642	0.348778	0.212546	0.0372263
-30	0.403284	0.230256	-0.0522341	0.307394	0.434239	0.123156	0.137467						0.346564	0.190502	0.029416	0.591074	0.516448	0.388982	0.143831
-20	0.579249	0.47025	-0.0234135	0.485253	0.639862	0.202696	0.424987						0.57313	0.393103	0.0871728	0.716165	0.759295	0.573632	0.374329
-10	0.70129	0.662158	0.133005	0.614288	0.80251	0.456733	0.668441						0.723909	0.563651	0.196074	0.705998	0.905907	0.711234	0.574759
0	0.797535	0.765456	0.304464	0.727561	0.912539	0.73622	0.812793						0.816952	0.534735	0.318114	0.607548	1	0.836344	0.738969
10	0.854806	0.844732	0.445597	0.778551	1	0.895605	0.907241						0.880511	0.544468	0.723146	0.583851	0.976355	0.962717	0.846884
20	0.926726	0.908453	0.559837	0.865633	0.964473	0.972033	0.95169						0.953687	0.659289	0.829446	0.727934	0.852277	1	0.89954
30	0.96915	0.969574	0.945371	0.92126	0.753169	0.978617	0.971876						0.979383	0.805357	0.907399	0.86131	0.225084	0.888391	0.964036
40	1	1	1	1	0.271085	1	1						1	1	1	1	0.156162	0.575416	1
d
Vm	Pre-Drug															HHP
-60	-0.513961	-0.399682	-0.0675898	0.246319	-1.03775	0.803447		0.0200438								0.995493	-0.751119	-0.346176	-0.629299	-0.633543	0.256811		-0.36258
-50	-1.3329	-1.15845	-2.58524	-2.06079	-2.12225	-1.04669		-1.20888								0.682267	-1.46252	-1.94361	-2.02748	-1.49077	-1.11456		-1.55867
-40	-4.80018	-4.69772	-15.8719	-7.69879	-6.77655	-14.1942		-4.92655								-1.92701	-3.6546	-10.3497	-8.71109	-6.25668	-6.01629		-7.24592
-30	-15.2093	-10.5774	-36.7953	-23.4491	-18.0567	-43.9297		-28.7582								-9.5594	-7.21288	-16.998	-29.5377	-17.3817	-17.9528		-27.4677
-20	-30.6367	-8.77174	-30.836	-46.0867	-23.1493	-34.914		-50.4052								-11.9306	-6.44928	-14.0703	-29.7537	-20.0364	-22.0475		-34.2754
-10	-29.6223	-6.31405	-21.2834	-35.1233	-17.301	-24.3273		-37.1477								-7.81329	-3.76431	-9.33168	-20.6156	-15.1425	-16.5967		-23.7687
0	-18.7802	-2.89298	-13.5169	-20.8465	-10.3744	-14.1323		-19.5184								-3.15085	-1.82879	-5.43917	-12.3932	-8.77115	-9.31533		-11.2545
10	-8.96369	-0.46179	-6.89306	-7.85431	-5.30533	-5.73778		-6.16084								0.343888	-0.317743	-2.29757	-5.54415	-4.49941	-3.29843		-2.43291
20	-2.74401	1.41253	-1.83617	1.8512	-1.52506	1.28421		5.5848								2.95764	0.984294	-0.192672	-1.09244	-1.48171	1.00203		5.19885
30	1.48411	2.16797	1.36786	9.46482	0.42639	6.88157		15.306								4.60333	1.58218	1.38855	1.60325	0.450119	3.76069		11.0317
40	4.16534	2.38793	3.55436	15.205	0.654966	11.7383		24.9381								5.67749	3.29108	2.6095	3.74884	1.6821	3.50612		17.2553
50	6.67068	3.74623	5.08301	21.844	4.19952	16.3584		34.3822								6.86778	4.10358	3.21963	5.83304	2.63367	7.00207		22.3048
60	9.24901	4.96865	7.44738	27.6255	8.00917	20.1399		43.7451								7.84907	5.1827	4.22674	8.17091	3.30804	8.71402		28.6581
70	14.9864	15.1213	11.7316	39.755	9.61335	32.1083		64.1735								8.91813	10.1825	7.09237	12.4907	5.64703	15.8215		40.8032
e
Vm	Pre-Drug												HC-HA/PTX3
-60	0.00445796	0.00604677	0.00569407	0.00496944	0.00381618	0.00474877	0.00446826	0.0062616						0.0585893	0.00556706	0.00358457	0.00469035	0.012836	0.0114414	0.00725997
-50	0.00449022	0.0044699	-0.00111004	0.00897438	0.012094	0.0280621	0.0172319	0.031016						0.123867	0.00343361	0.0011921	0.00532782	0.0254564	0.036006	0.00574702
-40	0.00839716	0.0466682	0.0392081	0.0192291	0.0147019	0.110182	0.0945505	0.103412						0.16998	0.0392803	0.0419379	0.0484589	0.105472	0.1986	0.0433761
-30	0.0931577	0.15061	0.339535	0.0943181	0.125849	0.373292	0.295589	0.17392						0.200066	0.1329	0.214571	0.261565	0.285447	0.440138	0.186938
-20	0.413704	0.282918	0.537937	0.429129	0.403956	0.517981	0.579746	0.483155						0.336618	0.221716	0.357486	0.536182	0.59763	0.849027	0.498245
-10	0.77637	0.394458	0.687763	0.646168	0.615373	0.644544	0.819603	0.647473						0.529328	0.316743	0.473692	0.699862	0.797475	0.993985	0.703992
0	0.898615	0.431775	0.803908	0.763794	0.774462	0.732385	0.930725	0.748288						0.688693	0.322469	0.986263	0.824534	0.918616	1	0.806624
10	0.964897	0.405943	0.88139	0.856401	0.855985	0.82451	1	0.810966						0.775786	0.322469	0.992089	0.892741	1	0.96485	0.907753
20	0.99907	0.385213	0.936499	0.933478	0.934857	0.895438	0.998476	0.875362						0.875029	1	1	0.945517	0.999728	0.893456	0.961525
30	1	1	0.97214	0.972145	0.980941	0.942318	0.942933	0.921919						0.921013	0.972043	0.991649	0.981129	0.961548	0.771918	0.981158
40	0.992094	0.961097	1	1	1	1	0.865443	1						1	0.936142	0.979998	1	0.843024	0.666345	1
